1  
2  
3  
4  
5  
6  
7  
8  
9  
10  
11  
12  
13  
14  
15  
16  
17  
18  
19  
20  
21

**Energy landscape analysis elucidates the multistability of ecological communities across environmental gradients**

Kenta Suzuki<sup>1\*</sup>, Shinji Nakaoka<sup>2,3</sup>, Shinji Fukuda<sup>3-6</sup> and Hiroshi Masuya<sup>1</sup>

\* Corresponding author: [kenta.suzuki.zk@riken.jp](mailto:kenta.suzuki.zk@riken.jp), +81-0298369137

1. Integrated Bioresource Information Division, BioResource Research Center, RIKEN, 3-1-1 Koyadai, Tsukuba, Ibaraki 305-0074, Japan.

2. Laboratory of Mathematical Biology, Faculty of Advanced Life Science, Hokkaido University, Kita-10 Nishi-8, Kita-ku, Sapporo, Hokkaido 060-0819, Japan.

3. PRESTO, Japan Science and Technology Agency, 4-1-8 Honcho, Kawaguchi, Saitama 332-0012, Japan.

4. Institute for Advanced Biosciences, Keio University, 246-2 Mizukami, Kakuganji, Tsuruoka, Yamagata 997-0052, Japan.

5. Intestinal Microbiota Project, Kanagawa Institute of Industrial Science and Technology, 3-25-13 Tonomachi, Kawasaki-ku, Kawasaki 210-0821, Kanagawa, Japan.

6. Transborder Medical Research Center, University of Tsukuba, 1-1-1 Tennodai, Tsukuba, Ibaraki 305-8575, Japan.

1 **Abstract**

2 Compositional multistability is widely observed in multispecies ecological communities.  
3 Since differences in community composition often lead to differences in community function,  
4 understanding compositional multistability is essential to comprehend the role of biodiversity  
5 in maintaining ecosystems. In community assembly studies, it has long been recognized that  
6 the order and timing of species migration and extinction influence structure and function of  
7 communities. The study of multistability in ecology has focused on the change in dynamical  
8 stability across environmental gradients, and was developed mainly for low-dimensional  
9 systems. As a result, methodologies for studying the compositional stability of empirical  
10 multispecies communities are not well developed. Here, we show that models previously  
11 used in ecology can be analyzed from a new perspective - the energy landscape - to unveil  
12 compositional stability in observational data. To show that our method can be applicable to  
13 real-world ecological communities, we simulated assembly dynamics driven by population  
14 level processes, and show that results were mostly robust to different simulation assumptions.  
15 Our method reliably captured the change in the overall compositional stability of multispecies  
16 communities over environmental change, and indicated a small fraction of community  
17 compositions that may be channels for transitions between stable states. When applied to  
18 murine gut microbiota, our method showed the presence of two alternative states whose  
19 relationship changes with age, and suggested mechanisms by which aging affects the  
20 compositional stability of the murine gut microbiota. Our method provides a practical tool to  
21 study the compositional stability of communities in a changing world, and will facilitate  
22 empirical studies that integrate the concept of multistability from different fields.

23

24 **Key words:**

25 community assembly, compositional stability, historical contingency, multistability,  
26 alternative stable states, regime shift, presence/absence data, Markov network, pairwise  
27 maximum entropy model, principle of maximum entropy, stability landscape, energy  
28 landscape

29

30

31

## 1 **Introduction**

2 The order and timing of species migration and extinction during community assembly  
3 influence the structure (Drake 1991, Fukami and Morin 2003, Kadowaki et al. 2012) and  
4 function (Fukami et al. 2010, Jiang et al. 2011) of communities, resulting in multistability  
5 (also known as alternative stable states) of different community compositions (Fukami 2010,  
6 Fukami 2015). Compositional dynamics play a prominent role in real world ecosystem  
7 organization, and understanding community assembly in terms of the management of  
8 ecological systems has direct relevance to conservation biology, agriculture, and medicine  
9 (Fukami et al. 2015). There is a need for development of a methodology that accounts for  
10 compositional stability in multispecies communities to facilitate predicting, preventing and  
11 controlling large-scale shifts in community compositions.

12

13 In the field of microbial ecology, the recent development of next-generation sequencing  
14 technology has made it possible to comprehensively study community structures (Caporaso et  
15 al. 2010, Ding and Schloss 2014, Thompson et al. 2017, Bolyen et al. 2019). This  
16 development led to recognition of the association between composition and function of  
17 microbial communities that is essential for the maintenance of host organisms or physical  
18 environment (Costello et al. 2012, Widder et al. 2016, Sommar et al. 2017).

19

20 In the animal intestine there is a phenomenon called dysbiosis in which function is severely  
21 impaired due to infection or other causes (Carding et al. 2015). One example would be *C.*  
22 *difficile* infection (CDI) (Kelly and LaMont 2008, Britton and Young 2014) that can occur  
23 when the gut microbiota has been disrupted from its normal balance, e.g., by antibiotics. The  
24 normal microbiota is resistant to *C. difficile* colonization, whereas it is significantly altered  
25 when *C. difficile* successfully colonizes the intestine. There would be at least two community  
26 compositions (with or without *C. difficile*) that are stable at the same environmental  
27 conditions. In this case, transplantation of the normal microbiota can effectively restore the  
28 infected microbiota back to normal (Bakken et al. 2011). However, simply implanting a  
29 desirable microbiota is not a universal method for its establishment (Rilling et al. 2015,  
30 Castledine et al. 2020), and a more systematic methodology is required (Mueller and Sachs  
31 2015, Sbahi and Di Palma 2016, Toju et al. 2020).

32

33 There are many empirical examples of multistability in community assembly dynamics (see,  
34 e.g., review by Schlöder et al. 2005). In aquatic microbial communities, Drake (1991)  
35 showed the effect of the sequence of species invasions on final community composition.  
36 More recently, Pu & Jiang (2015) found that alternative community states were maintained  
37 for many generations despite frequent dispersal of individuals among local communities. On  
38 the other hand, studies of multistability in ecology have been mainly developed for low

1 dimensional systems (May 1977, Scheffer et al. 2001, Beisner et al. 2003). One typical  
2 example is the relationship between the abundance of phytoplankton and plant species with  
3 phosphorus concentration in lake systems (Scheffer and Jeppsen 2007); there are contrasting  
4 conditions represented by low and high algal density, and a gradual shift of phosphorus  
5 concentration triggers a rapid transition known as a catastrophic regime shift. These studies  
6 raise two important challenges regarding the analysis of compositional stability in  
7 multispecies communities, which we focus on here.

8  
9 First, the potential landscape description, called a “ball and cup diagram”, has been  
10 frequently used to explain the stability of low dimensional systems (see, e.g., Scheffer et al.  
11 2001), but how should it be interpreted when the system cannot be simplified to a few  
12 dimensions? As a solution, we introduce the concept of the *stability landscape* (Figure 1) in  
13 this paper. Walker et al. (2004) used the term to refer to the ball and cup diagram itself.  
14 Recent studies implement this idea to study the stability of microbial communities by  
15 projecting their abundance data on to a continuous potential landscape with a few dimensions  
16 (Gibson et al. 2017, Shaw et al. 2019). Here, we define the stability landscape as a structure  
17 that maps out the overall compositional stability of an ecological community. It can be  
18 represented as a graph with a set of community compositions and transition paths between  
19 them. Such a view has already been introduced in some experimental (Weatherby et al. 1998,  
20 Law et al. 2000, Warren et al. 2003) and theoretical studies (Law and Morton 1993, Capitan  
21 et al. 2011), but our goal here is to develop a methodology to study stability landscapes of  
22 empirical communities.

23  
24 Second, it is also important to capture changes in stability landscape in response to  
25 environmental changes. For example, Lahti et al. (2014) showed that there are some taxa in  
26 human gut microbiota that show contrasting abundances according to age and lead to a shift  
27 of microbial composition during middle to old age. In this case, age was regarded as a  
28 dominant parameter of the intestinal environment and the key to transition between two  
29 contrasting states. However, given that the composition of microbiota may shift due to causes  
30 other than aging, such as infections (Kelly and LaMont 2008, Costello et al. 2012), it would  
31 be important to address changes in the overall compositional stability rather than the stability  
32 of two contrasting states.

33  
34 To analyze the stability landscape of multispecies communities addressing the points  
35 described above, we introduce an *energy landscape analysis* (Becker and Karplus 1997,  
36 Wales et al. 1998, Watanabe et al. 2014a) incorporating an *extended pairwise maximum*  
37 *entropy model*. The extended pairwise maximum entropy model is a combination of two  
38 models that have previously been used in ecology. One is the species distribution model

1 known as MaxEnt (Philips et al. 2004, 2006), and the other is the pairwise maximum entropy  
2 model (Schneidman et al. 2006; in ecology it is introduced as Markov network, see, e.g.,  
3 Azaele et al. 2010, Araújo et al. 2011, Harris 2015). MaxEnt was developed around a model  
4 that predicts species distribution from environmental conditions, and by using the maximum  
5 entropy principle, it provides least-biased distribution estimates given prior knowledge such  
6 as observational data (Jaynes 1982, Harte and Newman 2014). The pairwise maximum  
7 entropy model has been used to predict species distribution and/or to detect signals of biotic  
8 interactions behind co-occurrence data (Azaele et al. 2010, Araújo et al. 2011, Harris 2016),  
9 and is obtained by applying the maximum entropy principle to co-occurrence information  
10 (Azaele et al. 2010).

11

12 While MaxEnt is known to give more accurate predictions relative to comparable models  
13 (Elith et al. 2006), it is unable to handle co-occurrence information that signals biotic  
14 interactions as well as shared environmental preferences between species (Kissling et al.  
15 2012, Ockendon et al. 2014, Thuiller et al. 2015, Barner et al. 2018, Freilich et al. 2018).  
16 When community-level occurrence data is available, such information can be used to obtain  
17 more accurate predictions for species distribution (Meier et al. 2010, Leach et al. 2016,  
18 Barbaro et al. 2019). Therefore, the integration of the two models is a natural extension to  
19 handle environmental and co-occurrence data simultaneously. This has been attempted in one  
20 previous study, aimed at improving the accuracy of species distribution predictions and  
21 refining the estimation of biotic interactions under environmental heterogeneity (Clark et al.  
22 2018), but the purpose of introducing the integrative model here is different.

23

24 By introducing the energy landscape analysis, we show how we can use the pairwise  
25 maximum entropy models to study the stability landscape of multispecies communities.  
26 While the stability landscape represents the actual compositional stability driven by  
27 population dynamics, the *energy landscape* is its approximation based on the maximum  
28 entropy principle given observational data. Briefly, energy landscape is a weighted network  
29 whose nodes represent unique community compositions and links represent transition path  
30 between them. Energy landscape analysis is the analysis of topological and connection  
31 attributes of the weighted network (Watanabe et al. 2014a). This analysis informs how a  
32 stability landscape constrains the compositional dynamics just as the ball and cup diagram  
33 does for low dimensional systems. Energy landscape analysis has its origins in the study of  
34 molecular dynamics (Becker and Karplus 1997, Wales et al. 1998) and was recently proposed  
35 as a data analysis method for neuroscience (Watanabe et al. 2014a,b, Ezaki et al. 2017,  
36 Watanabe & Rees 2017, Ezaki et al. 2018). Watanabe et al. (2014a) described the activity of  
37 multiple brain regions as binary vectors to show that the activity patterns of the resting brain  
38 are attracted to a small number of attractive states, and these states are hierarchically

1 structured. This was done by 1) defining a set of unique activity patterns (network nodes) and  
2 connections between them as the transition path between different activity patterns (network  
3 links), 2) weighting each activity pattern by energy given by a pairwise maximum entropy  
4 model, and 3) analyzing the connection attributes of the weighted network.

5  
6 We attempt to fully ground the concept of energy landscape analysis in an ecological context,  
7 and, by introducing the extended pairwise maximum entropy model, add a methodological  
8 advancement to account for the shift of stability landscapes across environmental changes.  
9 This will be a practical tool to study the compositional stability of multispecies communities  
10 in a changing environment, and will open up the possibility of empirical studies that integrate  
11 the concept of alternative stable states in community assembly studies and regime shifts  
12 developed mainly for low-dimensional systems. To show that our proposed method can be  
13 applicable to real-world ecological communities, we simulated the assembly dynamics driven  
14 by population level processes, and show that the features characterizing the stability  
15 landscape can be effectively inferred by pairwise maximum entropy models with the help of  
16 energy landscape analysis.

17  
18 This paper is organized as follows. In the next section, we thoroughly explain our  
19 methodology, as well as the setup of a Lotka-Volterra (LV) model that we used for  
20 benchmarking. We then demonstrate how a stability landscape of the LV model was studied.  
21 We also benchmarked our methodology for multiple independent data sets obtained from  
22 different simulation conditions. Finally, as the application to a real-world community, we  
23 applied our methodology to the murine gut microbiota (Nakanishi et al. 2020). We found two  
24 alternative stable states and revealed how change in their relative stability is affected by age  
25 interacting with species relationships.

## 26 27 28 **Materials and Methods**

### 29 *Definition of state space*

30 By formalizing the concept of the stability landscape, we obtain a definition of the state space  
31 for an energy landscape. We define community composition  $\sigma$  as a binary vector of length  
32  $S$ . Here,  $S$  is the total number of species. There is a total of  $2^S$  unique community  
33 compositions, which are the nodes of the stable state. We denote a community composition of  
34  $k$ th sample ( $k \in \{0, 1, \dots, 2^S - 1\}$ ) as  $\sigma^{(k)} = (\sigma_1^{(k)}, \sigma_2^{(k)}, \dots, \sigma_S^{(k)})$ , where  $\sigma_i^{(k)} \in \{0, 1\}$  is the  
35 presence absence status of the  $i$ th species. Then, we define the links that connect community  
36 compositions under the assumption that community compositions change in a stepwise  
37 manner, i.e., two community compositions are adjacent by a link only if they have the

1 opposite status (i.e., 0/1) for just one species. Under this assumption, the community  
2 compositions form a regular network in which each node has  $S$  links.

3

#### 4 *Pairwise maximum entropy models and Energy landscape*

5 We assign energy to each community composition and impose the potential structure to the  
6 state space by introducing the extended pairwise maximum entropy model. The model  
7 determines the probability of the occurrence of community composition  $\sigma^{(k)}$  in an  
8 environmental condition  $\epsilon = (\epsilon_1, \epsilon_2, \dots, \epsilon_M)$ , which is an array of continuous values  
9 representing environmental factors such as resource availability, pH, temperature, or age of  
10 host organism:

$$11 \quad P(\sigma^{(k)}|\epsilon) = e^{-E(\sigma^{(k)}, \epsilon)} / Z, \quad (1)$$

$$12 \quad E(\sigma^{(k)}, \epsilon) = -\sum_{i=1}^S h_i \sigma_i^{(k)} - \sum_{j=1}^S \sum_{i=1}^M g_{ij} \epsilon_i^{(k)} \sigma_j^{(k)} - \sum_{i=1}^S \sum_{j=1, j \neq i}^S J_{ij} \sigma_i^{(k)} \sigma_j^{(k)} / 2. \quad (2)$$

13 Here,  $E(\sigma^{(k)}, \epsilon)$  is defined as the energy of community composition  $\sigma^{(k)}$ , and

$$14 \quad Z = \sum_{k=0}^{2^S-1} e^{-E(\sigma^{(k)}, \epsilon)}. \quad (3)$$

15 It is worth noting that we label  $E(\sigma^{(k)}, \epsilon)$  as energy simply because of the terminology for  
16 the same equation in statistical physics (Brush 1967, Azaele et al. 2010). In ecology, it is  
17 nothing but an exponent in eq.(1) and is an indicator of how often a community composition  
18 is likely to be observed; it does not correspond in any way to the physical form of energy  
19 used in the ecological studies. Parameters in eq.(2) are  $h_i$ s,  $J_{ij}$ s and  $g_{ij}$ s, which are elements  
20 of a vector  $h = (h_1, h_2, \dots, h_S)$  and matrix  $J = (J_{ij})_{i=1,2,\dots,S; j=1,2,\dots,S}$  and matrix  $g =$   
21  $(g_{ij})_{i=1,2,\dots,M; j=1,2,\dots,S}$ , respectively.  $h_i$  is the net effect of unobserved environmental factors  
22 that may favor the presence ( $h_i > 0$ ) or absence ( $h_i < 0$ ) of species  $i$ , and  $g_{ij}$  represents the  
23 effect of the  $i$ th (observed) environmental factor on the occurrence of the  $j$ th species. Each  
24 species is coupled to all others in a pairwise manner through  $J_{ij}$ s ( $J_{ij} = J_{ji}$ ), therefore  $J_{ij} > 0$   
25 favors the co-occurrence of species  $i$  and  $j$  and  $J_{ij} < 0$  disfavors the co-occurrence of  
26 species  $i$  and  $j$ . The extended pairwise maximum entropy model can be reduced to the  
27 pairwise maximum entropy model (Azaele et al. 2010, Araújo et al. 2011, Harris 2015) with,

$$28 \quad E(\sigma^{(k)}) = -\sum_{i=1}^S h_i \sigma_i^{(k)} - \sum_{i=1}^S \sum_{j=1, j \neq i}^S J_{ij} \sigma_i^{(k)} \sigma_j^{(k)} / 2, \quad (4)$$

29 if the effect of environmental conditions can be ignored. Eq. (2) and (4) include pairwise  
30 relationships. Thus, it is assumed that all higher-order occurrence patterns are well-captured  
31 by the information encapsulated in the first two moments (Azaele et al. 2010). This is relaxed  
32 by including the high order terms in these equations. However, such extension would  
33 increase the dataset size required to obtain enough predictive performance (Nguyen et al.  
34 2017).

35

1 The pairwise maximum entropy models assign energy to each community composition in  
2 state space. The energy represents the directionality of the transition between community  
3 compositions. For each pair of two adjacent nodes (say,  $\sigma^{(k)}$  and  $\sigma^{(k')}$ ), let  $P(\sigma^{(k)}) <$   
4  $P(\sigma^{(k')})$  such that  $E(\sigma^{(k)}) > E(\sigma^{(k')})$ . The transition of community compositions is more  
5 likely to occur from  $\sigma^{(k)}$  to  $\sigma^{(k')}$  than  $\sigma^{(k')}$  to  $\sigma^{(k)}$ . Since such a local transition rule  
6 governs the transition dynamics in a chain, the energy landscape determines the directionality  
7 of overall compositional dynamics. We expect that this could be an approximation of the  
8 stability landscape.

9  
10 We assume that we have a dataset containing the community compositions of  $N$  samples  
11 (Fig. 2A, B). We denote the community composition of samples as an  $S \times N$  matrix  $X =$   
12  $(x_1, x_2, \dots, x_N)$  and  $x_i \in \{\sigma^{(1)}, \sigma^{(2)}, \dots, \sigma^{(2^S)}\}$  (Fig. 1B). If available, we denote the  
13 environmental condition of  $N$  samples as  $M \times N$  matrix  $Y = (y_1, y_2, \dots, y_N)$ , where local  
14 environmental condition  $y_i = \varepsilon^{(i)} = (\varepsilon_1^{(i)}, \varepsilon_2^{(i)}, \dots, \varepsilon_M^{(i)})$  represents the environmental factors  
15 of the  $i$ th sample (Fig. 2B). Thus, a pair of  $X$  and  $Y$  is the observational data required for our  
16 analysis ( $Y$  is not always necessarily). The maximum likelihood estimates of  $h$ ,  $J$  and  $g$   
17 (Fig. 2C) can be obtained by a gradient descent for the pairwise maximum entropy model  
18 (eq.(4)) or stochastic approximation method for the extended pairwise maximum entropy  
19 model (eq.(2)) as described in Appendix S1. Since these equations are derived from the  
20 maximum entropy principle, probability distribution of community compositions with these  
21 parameters is the least biased estimate given the observational data (Jaynes 1982, Harte and  
22 Newman 2014). In other words, the probability distribution satisfies the constraints imposed  
23 by the observational data while maximizing the remaining uncertainty. This is a reasonable  
24 and well-verified (Shipley et al. 2006, Elith et al. 2006, Franklin 2009, Parisien and Moritz  
25 2009, Harte 2011, Staniczenko et al. 2017, Clark et al 2018) assumption to estimate the  
26 probability of the occurrence of a community composition that is not actually observed.

27

28

### 29 *Energy landscape analysis*

30 Energy landscape analysis is an analysis on the topological and connection attributes of an  
31 energy landscape (Fig. 2D). Below, we show how to identify its key components and explain  
32 how they can help us to understand the structure of a stability landscape. We will use the term  
33 “node” in the same sense as one community composition.

34

35 *Energy minima* - We identify energy minima of an energy landscape as *stable states* of a  
36 stability landscape (red and yellow filled circles in Fig. 2D). The local minima have the  
37 lowest energy compared to all neighboring nodes, and thus constitute end-points when  
38 assembly processes are completely deterministic (i.e., when transition of community



1 compositions always go down the energy landscape). Presence of multistability can be  
2 identified as multiple energy minima within an energy landscape. Since an energy minimum  
3 is a node with energy less than all  $S$  neighboring nodes, we examined whether each of the  
4  $2^S$  nodes were local minima. The same idea has already been described in Azaele et al.  
5 (2010) but was there only mentioned it briefly in the analysis of a plant community  
6 distribution.

7  
8 *Basin of attraction* - The basin of attraction (red and yellow circles in Fig. 2D) is the set of  
9 community compositions that reach one distinct stable state when assembly processes are  
10 completely deterministic, and are identified according to the stable state to which it  
11 converges. The basin of attraction to which a community composition belongs is determined  
12 by a steepest descent method, as follows. First, we selected a node  $i$  in the energy landscape.  
13 If the selected node is not a local minimum, we moved to the node with the lowest energy  
14 value among the nodes adjacent to the current node. We repeated moving downhill in this  
15 manner until a local minimum was reached. The initial node  $i$  belongs to the basin of the  
16 identified local minimum. We ran this procedure for each of  $2^S$  nodes except for the local  
17 minima.

18  
19 *Disconnectivity graph* - A disconnectivity graph is a tree diagram that summarizes the  
20 hierarchical relationships among stable states of an energy landscape (Fig. 2D). Terminal  
21 leaves of the tree represent the stable states and their vertical positions represent their energy  
22 values. Those of the branches represent the height of the *energy barrier* that separates the  
23 stable states belonging to the two branches. Here, the community composition connecting  
24 two branches is a *tipping point*. The tipping point is the lowest part of the ridge between two  
25 basins (green filled-circles in Fig. 1D). When we consider the transition from a stable state  
26  $\sigma^{(A)}$  to stable state  $\sigma^{(B)}$  ( $\sigma^{(A)} \rightarrow \sigma^{(B)}$ ), the height of the energy barrier is calculated as the  
27 energy of the tipping point minus that of  $\sigma^{(A)}$ . Similarly, the height of the energy barrier for  
28  $\sigma^{(B)} \rightarrow \sigma^{(A)}$  is calculated as the energy of the tipping point minus that of  $\sigma^{(B)}$ . Thus, the  
29 directionality of the transition between two stable states is typically asymmetrical and  
30 transitions with smaller energy barriers occur more frequently than the opposite direction.  
31 Tipping points can be obtained by checking connectivity of an energy landscape while  
32 changing an energy threshold value as follows. First, we set an energy threshold value,  
33 denoted by  $E_{th}$ , to the energy value of the node that attained the second highest energy value  
34 among community compositions. Second, we removed the node (and the links connected to  
35 the node) with the highest energy value such that the node with energy  $E_{th}$  becomes the  
36 highest energy state. Third, we checked whether each pair of stable states was connected in  
37 the reduced network. Forth, we lowered  $E_{th}$  to the second highest energy value again. Then,  
38 we repeated this process until all the local minima were isolated. For each pair of stable

1 states, we recorded a community composition having the lowest  $E_{th}$  value below which the  
2 two stable states were disconnected. In practice, some stable states must be removed because  
3 they are implausible. Here, we pruned stable states whose shallowest energy barrier was 20%  
4 lower than the highest energy barrier among all energy barriers across the energy landscape.

5  
6 *Stable state diagram* – A stable state diagram unfolds the energy of stable states and tipping  
7 points in disconnectivity graphs over environmental conditions (Fig. 2D). It maps out how an  
8 energy landscape changes in response to environmental gradients. A stable state (and tipping  
9 point) is represented as a line segment that indicates a range of environmental conditions in  
10 which it is identified. Typically, we identify stable states as solid lines and tipping points as  
11 dashed lines.

12  
13 *Numerical simulations* - We carried out numerical simulations to generate transition  
14 sequences of community compositions constrained by an energy landscape, and we refer to  
15 these simulations as *emulated compositional dynamics* (Fig. 2D). We employed the heat-bath  
16 method (also known as Gibbs sampling; Gilks et al. 1996) as follows. First, we selected an  
17 initial community composition. Then, at each time step, a transition from the current  
18 community composition  $\sigma^{(k)}$  to one of its  $S$  adjacent community composition  $\sigma^{(k')}$ ,  
19 selected with probability  $1/S$ , was attempted ( $\sigma^{(k)}$  and  $\sigma^{(k')}$  differ only with respect to the  
20 presence/absence status of one of  $S$  species). The transition to the selected community  
21 composition took place with probability  $e^{-E(\sigma^{(k')})}/(e^{-E(\sigma^{(k)})} + e^{-E(\sigma^{(k')})})$ .

22  
23 By using the algorithm, we collected transition sequences of community compositions  
24 between different stable states. We then extracted the community composition having the  
25 highest energy in each transition sequence. These compositions constitute the *effective*  
26 *boundary* between the basin of stable states on the energy landscape. We refer to a fraction of  
27 effective boundary that mediates most of the transition between two stable states as *transition*  
28 *channels*.

### 31 *Competitive Lotka-Volterra model*

32 To test the applicability of our method to community assembly dynamics driven by  
33 population level processes, we used the following Lotka-Volterra (LV) competition equation:

$$34 \quad dx_i = x_i(1 - \sum a_{ij}x_j + \sum b_i\epsilon). \quad (5)$$

35 Here,  $x_i$  is the population abundance of species  $i$  and it is an element of abundance vector  
36  $\vec{x}$ . A positive real number  $a_{ij}$  represents competitive interactions between species  $i$  and  $j$ ,  
37 which is an element of an interaction matrix  $A = (a_{ij})$ . The diagonal elements of  $A$ , i.e.,

1  $a_{ii}$ s, represent the intraspecific interactions. The environmental condition is represented by  
 2  $\epsilon$ . It can include multiple environmental factors, but we assumed that it is a scalar with a  
 3 range of  $[0, 1]$  throughout our simulation. If we do not consider environmental variation  
 4 then  $\epsilon = 0$ . Response of species  $i$  to  $\epsilon$  is represented by  $b_i$ , which is an element of a  
 5 response vector  $b$ . When  $\epsilon = 0$ , eq. (5) is considered to be one of the simplest multi-species  
 6 systems whose multistability has already been investigated (Gilpin and Case 1976). In a more  
 7 general view, LV equations are derived as the continuous limit of individual based models  
 8 (Wilson et al. 1993) or an approximation of patch dynamic models (Keymer et al. 2000).  
 9 Therefore, the LV equation-based model will be an important starting point for testing the  
 10 applicability of our method to real-world ecological communities.

11  
 12 To simulate assembly dynamics, we introduced the processes of “extinction” and  
 13 “recruitment” into our model. Extinction is a process that reduces the frequency of species if  
 14 they fall below a certain threshold ( $e$ ) to zero, and recruitment is an operation to introduce a  
 15 species that is absent from the system at a propagule size ( $r$ ). We set  $e = 10^{-5}$  and  $r =$   
 16  $10^{-4}$  throughout this paper. To simplify the analysis, we set a fixed interval for recruitment  
 17  $\tau_r = 300$ .

18  
 19 *LV data set* - We generated a LV data set that characterizes the stability landscape of a LV  
 20 competition model. First, we generated 20,000 empty sites (i.e.,  $\vec{x}$ s such that all elements are  
 21 zero). The number of species,  $S$ , was fixed throughout the simulation. We assumed that the  
 22 population dynamics, extinctions and recruitments occurred independently among sites. We  
 23 obtained the numerical solution of the LV equation by the first-order Euler method with  
 24  $dt = 0.1$ . After the first species (randomly selected among  $S$  species) was added to each  
 25 site, every  $\tau_r$  steps, for each site we checked the absent species, randomly select one of  
 26 them and introduced it with a propagule size  $r$ . During these processes, the abundance vector  
 27  $\vec{x}$  of the LV model was recorded every 10 steps after replacing the abundance of species that  
 28 fell below  $e$  to zero. We interpreted  $\vec{x}$  as a community composition  $\sigma^{(k)}$  by an  
 29 observational threshold  $o = 10^{-3}$ , where abundance was replaced by 1 if  $x_i > o$  else 0.  
 30 Then, time series was interpreted as assembly sequences represented by community  
 31 compositions. The following test for stopping the simulation was applied every  $\tau_r$  steps  
 32 before introducing a species; let  $\hat{p}(\sigma^{(k)})$  be the present probability of community  
 33 compositions of 20,000 sites and  $\hat{q}(\sigma_i)$  be the same value at  $\tau_r$  steps ago, for the set of the  
 34 indices of community compositions  $K$  that appeared in records, we calculated the Jensen-  
 35 Shannon divergence between them as:

$$36 \quad D_{JS} = \sqrt{\left\{ \sum \hat{p}(\sigma^{(k)}) \log \frac{\hat{p}(\sigma^{(k)})}{\mu_{pq}(\sigma^{(k)})} + \sum \hat{q}(\sigma^{(k)}) \log \frac{\hat{q}(\sigma^{(k)})}{\mu_{pq}(\sigma^{(k)})} \right\} / 2}.$$

1 Here,  $\mu_{pq}(\sigma^{(k)}) = \{\hat{p}(\sigma^{(k)}) + \hat{q}(\sigma^{(k)})\}/2$ . The simulation was stopped if  $D_{JS} < 0.0001$ .  
2 We have arranged the numerical simulation procedure to facilitate the determination of stable  
3 states. It would be difficult to find an ecological interpretation of this procedure; currently,  
4 there are few studies on population-level models aimed at capturing compositional stability of  
5 multispecies communities (but see Capitan et al. 2011). It is beyond the purpose of this paper  
6 to consider what process should be implemented to reproduce the probability distribution of  
7 community compositions in nature.

8

9 *Evaluation* - By using the LV data set, we identified five features that characterize the  
10 stability landscape. Then, we compared them to the comparable features of an energy  
11 landscape inferred from community compositions sampled from the LV data set (prior to  
12 sampling, we truncated the first 25 points of the assembly sequences to remove the effect of  
13 initial conditions). For the sake of simplicity, we will refer to the former values as *actual*  
14 *features*. Actual features can only be obtained with large amounts of time series data.  
15 Therefore, the usual data analysis relies solely on the features of an energy landscape.

16

17 Actual features are calculated as follows. To reduce variation, we calculated these features  
18 for community compositions observed more than 20 times. Prior to this, we truncated the first  
19 five points of the assembly sequences to remove the effect of initial state. First, we identified  
20 the unique community compositions found at the end of each time series as stable states.  
21 These are directly comparable to the stable states of the energy landscape. Second, we  
22 calculated the *empirical probability* of the occurrence of a community composition  $\sigma^{(k)}$   
23 across overall assembly sequences as  $\hat{P}(\sigma^{(k)})$ . It is comparable to the probability calculated  
24 from a pairwise maximum entropy model,  $P(\sigma^{(k)})$ , which we refer to as the expected  
25 probability. Third, we calculated the *relative convergence time (RCT)* for each community  
26 composition. This value indicates distance from a community composition to a stable state to  
27 which it converges. RCT is calculated as follows: first, if there are sub-sequences of the same  
28 composition in an assembly sequence, we removed the redundancy by replacing them with  
29 one (i.e.,  $\{\dots, \sigma^{(A)}, \sigma^{(B)}, \sigma^{(B)}, \sigma^{(C)}, \dots\} \rightarrow \{\dots, \sigma^{(A)}, \sigma^{(B)}, \sigma^{(C)}, \dots\}$ ). Then, we rescaled the  
30 position of community composition as a value between 0-1. For each community  
31 composition,  $RCT(\sigma^{(k)})$  is the mean of their rescaled position in all sequences in which they  
32 appeared. RCT is comparable to the energy of community states; more precisely, we  
33 compared it to the *rescaled energy*  $\bar{E}_k$ , which takes 0 at a stable state and 1 at the community  
34 composition that has the highest energy within a basin of attraction. Fourth, we identified the  
35 basin of attraction of  $\sigma^{(k)}$  as follows: for each community composition  $\sigma^{(k)}$ , we picked the  
36 end state of the sequences in which it appeared and counted the number of each stable state.  
37 We determined that  $\sigma^{(k)}$  is in the basin of attraction of a stable state to which it most  
38 frequently converged (if there is more than one such state, it belongs to all of them). It is

1 directly comparable to the basin of attraction inferred by the energy landscape. Finally, we  
2 calculated the *imbalance score (IS)* to evaluate how stable states that a community  
3 composition converges to are uniquely determined. Similar to determining the basin of  
4 attraction, for each community composition  $\sigma^{(k)}$ , we picked the end state of sequences in  
5 which it appeared. Then, we calculated a Gini-Simpson index for the set of stable states as the  
6 imbalance score (i.e.,  $IS(\sigma^{(k)}) = 1 - \sum \tilde{p}_i^2$ ; here,  $\tilde{p}_i$  is the relative frequency of stable states).  
7 Different from other features, instead of defining a comparable value in the energy landscape,  
8 we used IS to evaluate the relevance of the hierarchical structure of the energy landscape to  
9 the actual transition dynamics.

### 12 *Murine gut microbiota*

13 We applied our approach to the data of gut-microbiota taken from the feces of six male  
14 C57BL/6J mice, which are in the DDBJ database (<http://trace.ddbj.nig.ac.jp/DRAsearch/>)  
15 under accession number DRA004786 (Nakanishi et al. 2020). Feces were sampled once every  
16 4 weeks between 4 to 72 weeks of age, thus 18 data points were obtained per mouse. Hence,  
17 108 data points are available. We transformed the relative abundance data into  
18 presence/absence data by setting a cutoff level at 1%, and we picked OTUs that were found  
19 in 20% to 80% of samples. This provided presence/absence data for 8 OTUs specified at the  
20 genus level. We also used mouse age (4-72 weeks) as an explicit environmental parameter. In  
21 the analysis, we scaled 4-72 weeks to a value within a 0-1 range. We assumed that a 4-week  
22 interval was sufficiently longer than the transient dynamics of the gut microbiota (Gerber  
23 2014), and treated microbiota composition of the same mouse at different ages as  
24 independent data.

### 27 *Software*

28 We used Mathematica (version 10.2 and 11.0, Wolfram Research, Inc., Champaign, Illinois,  
29 USA) to implement the method and generate simulation data. Computer codes (Mathematica  
30 notebook and package file) are available as online supporting information (DataS1).

## 33 **Results**

### 34 *Analysis of a competitive Lotka-Volterra system*

35 We analyzed the stability landscape of a 16-species competitive LV system with a fixed  
36 environmental condition ( $\epsilon = 0$ ) having three stable states (Fig 3; see Appendix S2: Table S1  
37 for the parameter values). We first generated the LV data set, calculated actual features, and  
38 sampled 256 compositions across assembly sequences to fit the parameters of the pairwise

1 maximum entropy model. At the population level, there were sequences of extinctions and  
2 invasions, and the system finally converged to one of three stable states. Below, in order to  
3 emphasize that we are considering community compositions, we denote a community  
4 composition as  $C_k$  instead of  $\sigma^{(k)}$ ;  $k$  is an integer obtained by transforming a binary vector  
5 into a decimal number, e.g., if the community composition is  $(0,1,1,0,1)$ , it is represented as  
6  $C_{13}$ .

7  
8 The stable states were  $C_{25233}$ ,  $C_{38092}$  and  $C_{59852}$  and they appeared 5,332, 6,002, and 8,666  
9 times within 20,000 simulations. We found 19,190 unique community compositions in the  
10 simulation out of  $2^{16} = 65,536$  possible compositions. The length of the assembly  
11 sequences was 80 points and we used 75 points after truncating the first 5 points. Thus, we  
12 had  $20,000 \times 75 = 150,000$  data points for calculating actual features. We focused on  
13 1628 community compositions that appeared 20 times or more. While they are only 8% of the  
14 unique community compositions found in the assembly sequences, they covered 75% of  
15 observations, *i.e.*, a small fraction of community compositions appeared repeatedly.

16  
17 *Energy landscape of the LV system* - Figure 4a shows the disconnectivity graph obtained  
18 from the energy landscape analysis of the LV system. Since we do not consider  
19 environmental variation in this case, we used eq. (4) for the analysis. The stable states  
20 identified by the energy landscape analysis were in perfect agreement with that of the LV  
21 system. Figure 4b is a scatterplot comparing the expected probability  $P(\sigma^{(k)})$  calculated by  
22 the pairwise maximum entropy model (x-axis) and the empirical probability  $\hat{P}(\sigma^{(k)})$  (y-  
23 axis). This analysis is not specific to the energy landscape analysis but is a general criterion  
24 to assess the performance of maximum entropy models (Azaele et al. 2010). The Spearman  
25 rank correlation coefficient was 0.40 ( $p < 0.001$ ). This value shows the overall performance of  
26 the maximum entropy model to predict the occurrence of community compositions.  
27 However, this value may be underestimated because the number of observations is not large  
28 enough to make an accurate calculation for  $\hat{P}(\sigma)$  of rare community compositions. Figure 4c  
29 shows the relationship between the rescaled energy ( $\bar{E}_k$ ) and relative convergence time (RCT;  
30 y-axis). The Spearman rank correlation coefficient was 0.36 ( $p < 0.001$ ), 0.69 ( $p < 0.001$ ), and  
31 0.52 ( $p < 0.001$ ) for predicted basins of attraction of  $C_{25233}$ ,  $C_{38092}$  and  $C_{59852}$  and their  
32 weighted mean according to the number of observations (Table 1) was 0.55. The correlation  
33 found here indicates that the energy landscape agrees well with the actual stability landscape,  
34 in the sense that it will predict the order in which community compositions appear during  
35 transient to stable states.

36  
37 We next evaluated how well the energy landscape predicted the basin of attraction. The color  
38 of each circle in figure 4c represents the basin of attraction of the energy landscape. A filled

1 or open circle represents whether it agrees (or disagrees) with the stability landscape. The  
2 overall result for the prediction is summarized as a confusion matrix with both number of  
3 community compositions and observations (Fig. 4d). As suggested from the disconnectivity  
4 graph (Fig. 4a), the basins of attraction of  $C_{38092}$  and  $C_{59852}$  are more easily mislabeled with  
5 each other than those of  $C_{25233}$  and  $C_{38092}$  or  $C_{25233}$  and  $C_{59852}$ . To evaluate the predictive  
6 performance in more detail, we calculated precision and recall for different positions in the  
7 energy landscape according to the number of correct/incorrect observations (Fig. 4e-h). The  
8 overall precision and recall for the basin of attraction of  $C_{25233}$ ,  $C_{38092}$  and  $C_{59852}$  is in Table 1.  
9 The weighted mean of the precision and recall according to the number of observations of  
10 each stable state was 0.80 and 0.79, respectively. As the overall trend, both precision and  
11 recall increased when  $\bar{E}_k$  decreased (Fig. 4e,f). Since community compositions having lower  
12  $\bar{E}_k$  are expected to be close to the stable states, this result suggests that the energy landscape  
13 is a good approximation of the stability landscape especially around the stable states.  
14 Furthermore, in addition to figure 4d, we see how the hierarchical relationship among the  
15 stable states (fig. 4a) reflect the relationship of stable states in the stability landscape. As  
16 energy decreased, the recall for the basin of attraction of  $C_{25233}$  increases faster than that of  
17  $C_{38092}$  and  $C_{59852}$  (fig. 4f). Moreover, the imbalance score (IS) for  $C_{25233}$  and ( $C_{38092}$ ,  $C_{59852}$ )  
18 (here,  $C_{59852}$  is identified with  $C_{38092}$ ) was always larger than that of  $C_{38092}$  and  $C_{59852}$  (fig. 4i).  
19 This suggest that the transition towards  $C_{25233}$  tends to be determined at an earlier stage of  
20 assembly processes compared  $C_{38092}$  and  $C_{59852}$ . In other words, these two community  
21 compositions are in close proximity in the stability landscape. These results show the  
22 agreement between the dysconnectivity graph (fig. 4a) and the numerical simulations.

23  
24 *Emulating community assembly dynamics* - We considered the transition between stable  
25 states in the energy landscape to see how they inform the ridge structure that lies between the  
26 basins of stability landscape. Since we are considering assembly dynamics starting from an  
27 empty state, such ridge states may correspond to a set of community compositions where the  
28 terminal stable state is almost unique below it (i.e., they may be representing the points of no  
29 return in assembly processes). If a community composition is located on a ridge, it will have  
30 an intermediate RCT value in the sense that it is apart from both the stable states (where RCT  
31 is 0) and the states at the earlier stage of assembly dynamics (where RCT is close to 1). Also,  
32 because the dynamics are less deterministic on the ridge, it's IS will be lower than that of  
33 other community compositions having a comparable energy.

34  
35 Here, to demonstrate how we can use the energy landscape to study the ridge structure, we  
36 investigated the transitions between the stable state  $C_{38092}$  and  $C_{59852}$  in more detail. By using  
37 the heat bath algorithm, we collected 5,000 transition sequences of community compositions  
38 from  $C_{38092}$  to  $C_{59852}$  ( $C_{59852}$  to  $C_{38092}$ ). We then extracted the community composition having

1 the highest energy in each transition sequence as the effective boundary between them. There  
2 were 1,616 such compositions and, as shown in Figure 5a, in the LV data set, 81% of 14,668  
3 sequences that converged to  $C_{38092}$  or  $C_{59852}$  (Table 1) contained one of these compositions.  
4 We focus on the 100 lowest energy compositions as transition channels, since 0.3% of them  
5 (that is 56 out of 19,190, of all observed community compositions) actually appeared in 52%  
6 (7,596 out of 14,668) of assembly sequences. Figure 5b is the scatterplot showing the energy  
7 and RCT of community compositions where transition channels are highlighted as red points,  
8 and Figure 5c is the smoothed histogram of the RCT of transition channels and that of all  
9 community compositions. RCT of transition channels had a median of 0.33 (95% CI, 0.31-  
10 0.37), which was lower than that of all compositions, which was 0.65 (95% CI, 0.64-0.66).  
11 Furthermore, the IQR (difference between the third and first quartiles) of transition channels  
12 was 0.16 (95% CI, 0.10-0.22), which was lower than that of all compositions (0.29; 95% CI,  
13 0.27-0.30). Thus, transition channels tended to be clustered in a narrow area of the lower part  
14 of the stability landscape. Figure 5d shows RCT and IS of transition channels (red) or other  
15 130 community compositions in the range of energy where channels are distributed (Fig. 5b).  
16 The median of IS was 0.60 (95% CI, 0.56-0.79) for transition channels and it was smaller  
17 than that of others which was 0.80 (95% CI, 0.65-0.92). From the above, it can be said that  
18 there is a certain relationship between the ridge that controls the transitions between  $C_{38092}$   
19 and  $C_{59852}$  on the energy landscape and the structure of the stability landscape that determines  
20 direction of assembly towards  $C_{38092}$  or  $C_{59852}$ .

21  
22 *Energy landscape across environmental gradient* - If species occurrence depends on abiotic  
23 factors, change in the stability landscape in response to environmental changes will be  
24 observed. Here, we generated LV data sets with variation in environmental parameter  $\epsilon$  and  
25 a fixed response vector  $b$  (see Appendix S2: Table S1 for the parameter values), and  
26 demonstrate how the energy landscape of the extended pairwise maximum entropy model can  
27 capture the change in the stability landscape across  $\epsilon$ .

28  
29 We generated a LV data set for  $\epsilon$  at every 0.01 steps between 0 and 1 to calculate the  
30 features of a stability landscape. Figure 6a shows the number and composition of stable states  
31 with respect to  $\epsilon$ . The black lines show the range of  $\epsilon$  in which a community composition  
32 was observed as a stable state. There were three branches that originated from  $C_{59852}$ ,  $C_{25233}$   
33 and  $C_{38092}$ ;  $C_{59852}$  disappeared at  $\epsilon = 0.08$ ,  $C_{25233}$  changed to  $C_{58001}$  at  $\epsilon = 0.125$  and then  
34 disappeared at  $\epsilon = 0.3$ , and  $C_{38092}$  sequentially changed to five other community  
35 compositions across  $\epsilon = 0$  to 1.

36  
37 We randomly sampled 256 community compositions from the above data set for the  
38 parameter fitting of the extended pairwise maximum entropy model and then applied the



1 energy landscape analysis. Our approach identified all existing branches of stable states and  
2 slightly over-estimated the range of  $\epsilon$  in which they exist (Fig. 6b). Also, it captured the  
3 sequence of the transition of community compositions within the branch of  $C_{25233}$  and  $C_{38092}$ ,  
4 except for false detection of  $C_{41617}$  and non-detection of  $C_{38284}$ . The correlation between  $\hat{P}(\sigma)$   
5 and  $P(\sigma)$  (Fig. 6c) was around 0.4 and slightly decreased with  $\epsilon$ . This value was  
6 comparable to the corresponding value in the constant environment we described above  
7 (0.40). Correlation between RCT and  $\bar{E}_k$  (Fig. 6d) was mostly larger than 0.5 before  $\epsilon <$   
8 0.7, and then it started to decrease. While we did not investigate the reason in detail, this  
9 might be due to the increase in the stability of a single stable state that can reduce the range  
10 of community compositions other than the stable state within the data set. Overall, however,  
11 the addition of an environmental axis did not significantly reduce the accuracy of the stability  
12 landscape estimates.

13  
14

### 15 *Benchmarking*

16 In our baseline condition (A in Fig. 7), the median Spearman rank correlation between the  
17 empirical and expected probability for the community compositions was 0.43, for RCT and  
18  $\bar{E}_k$  the same value was 0.51. The median of both precision and recall was 1 for stable states,  
19 and 0.79 for the basins of attraction. Reducing the number of stable states in the LV system  
20 only modestly affected the results (B in Fig. 7), but increasing it slightly made it difficult to  
21 predict basins of attraction (C in Fig. 7). This is unsurprising given that it increases the  
22 likelihood of confusion among basins. Increasing the number of species tended to make  
23 identification of stable states and their basins more difficult (D in Fig. 7). However, the  
24 difference would be small, given that the total number of possible compositions of 24-species  
25 system is 256 times larger than for the 16-species model. Although the increase of the data  
26 set size improved the results when comparing 128 and 512 data point cases (E and F in Fig.  
27 7), no additional improvement was found when comparing 256 and 512 data point cases (A  
28 and F in Fig. 7). Because of the fundamental difference between the stability landscape of LV  
29 system and the energy landscape, this suggests the limitations of approximating the former by  
30 the later. Both Type II functional response (G) and system noise (H) did not alter the results  
31 much, but slightly reduced the correlation between  $\bar{E}_k$  and RCT.

32  
33

### 34 *Application to real data*

35 We applied our approach to the gut microbiome data of six mice with 108 samples.  
36 Community compositions were represented by eight genus-level OTUs that can be identified  
37 as species in the above analysis, and we used mouse age as the environmental condition (i.e.,  
38 only one environmental factor was considered). Since we included only age as the

1 environmental factor in the analysis, in the extended pairwise maximum entropy model (eq.  
2 (2)),  $\varepsilon$  is a scalar associated with each sample and  $g$  is a vector that represents response of  
3 each species to age.

4  
5 At the community level, there were two stable states  $C_{227}$  and  $C_{93}$  at initial age (Fig. 6a).  $C_{227}$   
6 remained until 72 weeks and showed reduced energy with increasing age.  $C_{93}$  had lower  
7 energy than  $C_{227}$ , and increased energy as age increased.  $C_{93}$  changed to  $C_{125}$  at 29 weeks of  
8 age and then showed reduced energy with increasing age.  $C_{125}$  further changed to  $C_{253}$  at 38  
9 weeks of age. The energy of  $C_{125}$  and  $C_{253}$  was lower than  $C_{227}$  up to 72 weeks of age. The  
10 difference in the height of the energy barriers between the two alternative stable states (i.e.,  
11 distance between the stable states to the tipping point with respect to y-axis in Fig. 8a)  
12 decreased with increasing age until  $C_{125}$  changed to  $C_{253}$ . These results suggest that  $C_{93}$  is  
13 more representative of gut microbiota during early life stages. The difference between  $C_{93}$   
14 and  $C_{227}$  was the presence of a group of three genera (unclassified Lachnospiraceae,  
15 unclassified Ruminococcaceae and *Oscillospira*) or *Sutterella* (Table 2). Although  $C_{93}$  did not  
16 contain *Turicibacter* and *Bifidobacterium*, these genera sequentially appeared as  $C_{93}$  changed  
17 to  $C_{253}$ : *Turicibacter* appeared when  $C_{93}$  changed to  $C_{125}$  and *Bifidobacterium* appeared when  
18  $C_{125}$  changed to  $C_{253}$ .

19  
20 In addition to the height of energy barriers, the number of community compositions and  
21 energy distribution of the basins of attraction provides information on the robustness and  
22 variability of stable states. Figure 8b shows the energy distribution of community  
23 compositions in the basins of attraction of  $C_{93}$  and  $C_{227}$  at 10 weeks of age. The median and  
24 IQR of the two energy distributions were almost the same, but the difference in the number of  
25 community compositions was large (Fig. 8b, Table 2). In other words,  $C_{93}$  is more stable to  
26 stochastic variation than  $C_{227}$  in the sense that it has a larger basin of attraction. However, this  
27 difference almost disappeared by 60 weeks of age (Fig. 8c, Table 2). On the other hand, the  
28 difference between the median and stable state energies was 6.76 for  $C_{93}$  and 3.87 for  $C_{227}$  in  
29 10 weeks of age (Table 2). This was mainly because of the fact that  $C_{93}$  had a sharp decline in  
30 energy around the stable state (Fig. 8d), which is also indicated by the smaller kurtosis for  $C_{93}$   
31 than  $C_{227}$  (Table 2). Interestingly, in  $C_{253}$ , which is on a branch of  $C_{93}$  (Fig. 8a), the difference  
32 between the median and stable state energies decreased (accompanying the increase in  
33 kurtosis) (Fig. 8c, Table 2) despite the decrease in stable state energy. This resulted in a  
34 reduced slope around the stable state (Fig. 8e), and lead to increase in the amplitude and  
35 autocorrelation of compositional variation around  $C_{253}$  (Fig. 8f, g).

36  
37 This is not specific to energy landscape analysis, but analysis of the estimated parameters  
38 provide some insights into the mechanisms behind community level responses (Azaele et al.

1 2010, Harris 2016). In figure 9a, the community level response is shown by the bars marked  
2 as ‘Total’ in addition to the genus level responses. The net effect of interspecific relationships  
3 ( $\sum_j J_{ij} \sigma_i^{(k)} \sigma_j^{(k)}$ ), the bacterial responses to age ( $g_i \epsilon$ ), and the implicit effect of environmental  
4 factors ( $h_i$ ; here, these values represent the sum of the effects other than the bacterial  
5 response to age or the biotic interaction between bacteria) are indicated by blue, orange and  
6 green, respectively. There were positive relationships among Lachnospiraceae,  
7 Ruminococcaceae and *Oscillospira* (Fig. 9b) and these relationships made up most of the  
8 interspecific relationships in C<sub>93</sub>, C<sub>125</sub> and C<sub>253</sub> (Fig. 9a). The three genera had a negative  
9 relationship with *Sutterella* (Fig. 9b). Thus, they could be mutually exclusive, which was  
10 responsible for the presence of two alternative stable states over age. *Sutterella* had a positive  
11 relationship with *Turicibacter* and *Bifidobacterium*, supporting their presence in C<sub>227</sub> (Fig. 9).  
12 In contrast, *Turicibacter* and *Bifidobacterium* had a negative relationship with  
13 Lachnospiraceae, Ruminococcaceae and *Oscillospira*. Thus, they were absent from C<sub>93</sub> and  
14 then appeared as an effect of age. The correlation between age and the presence of a genus  
15 became positive if  $g$  (genus level response to age; Table 3) was positive; this correlation  
16 became negative when  $g$  was negative. The sum of  $g$  across community members determined  
17 the community level response to age (Fig. 8a). Since both *Turicibacter* and *Bifidobacterium*  
18 were positively affected by age, they appeared with increasing age despite their negative  
19 relationship with Lachnospiraceae, Ruminococcaceae and *Oscillospira*. In Fig. 9a the effect  
20 of interspecific relationships with *Turicibacter* in C<sub>125</sub> was negative, while it was positive in  
21 C<sub>253</sub> because of a positive relationship with *Bifidobacterium* (Fig 9b). The relationship  
22 between *Turicibacter* and *Bifidobacterium* also facilitated the appearance of *Bifidobacterium*  
23 at 38 weeks of age (Fig. 8a). Because of their positive relationship with age, the appearance  
24 of *Turicibacter* and *Bifidobacterium* changed the community level response to age when C<sub>93</sub>  
25 changed to C<sub>125</sub> and C<sub>125</sub> changed to C<sub>253</sub>.

26

27 Our results show that there were two alternative stable states and their relative stability  
28 (difference in the height of the energy barriers between them) changed over age. To examine  
29 how this result explains microbial population dynamics represented by relative abundance  
30 data, we applied analysis of similarity (ANOSIM) to abundance of the 8 genera used for the  
31 energy landscape analysis. ANOSIM statistics of the abundance data grouped with age (4-28  
32 or 48-72 weeks) across different individuals was -884.8 ( $p < 0.001$ ), suggesting a difference in  
33 gut microbiota among early and later life stages. We then grouped abundance data with  
34 individuals in 4-28 or 48-72 weeks and applied the same analysis. ANOSIM statistics were -  
35 65.2 ( $p < 0.001$ ) for 4-28 weeks and -37.6 ( $p = 0.097$ ) for 48-72 weeks. Thus, individual  
36 dependency of microbiota was strong in the early life stage and weakened in the later life  
37 stage. This was in correspondence with the structure of the energy landscape at 4-28 weeks;

1 since the energy barrier was higher and basin of attraction is larger for  $C_{93}$  than  $C_{227}$  (Fig. 8a,  
2 b), community composition would more likely remain in the basin of  $C_{93}$  once it shifted from  
3 that of  $C_{227}$ . At 48-72 weeks, switching between  $C_{227}$  and  $C_{253}$  is more likely because of the  
4 increased autocorrelation and amplitude of compositional variation (Fig. 8g) as well as the  
5 small difference in energy barrier between the two stable states (Fig. 8a), and it would reduce  
6 the individual dependency of stable states.

## 9 **Discussion**

10 We showed that with a relatively small amount of data, our method is able to identify the  
11 features characterizing the stability landscape, i.e., it successfully detects stable states (Table.  
12 1) and predicts basin of attraction (Fig. 4e-h), the position of each community composition  
13 with respect to the stable states (Fig.4c), and whether a community composition is on a ridge  
14 of basins in which end state is not uniquely determined (Fig.4i, Fig5). We confirmed with  
15 multiple different data sets that these results were mostly robust to different simulation  
16 conditions (Fig. 7), although the results suggested the limitation of approximating the  
17 stability landscape as the energy landscape. We also demonstrated that the same analysis was  
18 applicable to the case in which environmental conditions for each sample were different  
19 (Fig.6), without the need for increasing the amount of data. This result highlights that our  
20 method reliably captures the change of the overall compositional stability of a multispecies  
21 community over environmental change, which we regarded as the requisites for integration of  
22 compositional stability and regime shift concepts.

24 Our approach to quantifying compositional change in multi-stable communities could help  
25 the development of early warning signals for shifts of stable states (Scheffer et al. 2012,  
26 2015). Our analysis suggested that a small fraction of community compositions may be  
27 channels for transitions between alternative stable states (Fig. 5). If a system is in one of such  
28 states, it may indicate an increasing probability of transition to another stable states. This  
29 would be a basis for developing an early warning signal and considering some possible  
30 intervention to prevent such shifts. Secondly, given how spatial scale interacts with the  
31 drivers of community assembly (e.g. Chase 2014), the results of energy landscape analysis  
32 should be interpreted in light of the spatial scale of total sampling extent to disentangle the  
33 drivers of community assembly across scales (Viana & Chase 2019, Ross et al. submitted). If  
34 the spatial extent of observations is large and the effect of environmental heterogeneity is  
35 significant, by choosing a relevant environmental factor (or appropriately reducing multiple  
36 factors into a single dimension), the shift of stable community compositions can be unfolded  
37 with respect to the parameter as in the stable state diagram (Fig. 6b). One could then explore  
38 whether the model's explanation is consistent with our process-based understanding of

1 community assembly dynamics. Such an approach would complement existing methods  
2 proposed to assess the relative importance of the ecological processes that drive community  
3 assembly (Legendre et al. 2009, Meynard et al. 2013, D'Amen et al. 2018, Mertes & Jetz  
4 2018).

5  
6 In the murine gut microbiota, our approach showed the presence of two alternative states over  
7 age (Fig. 8a). The difference between the two stable states was characterized by presence of  
8 *Suterella* or unclassified Lachnospiraceae, unclassified Ruminococcaceae and *Oscillospira*  
9 (Table 3). Our result suggested that the stable state containing the three genera (C<sub>93</sub>) was  
10 more representative of the gut microbiota during early life stages because it had lower energy  
11 than the counterpart (C<sub>227</sub>) and became relatively unstable with increasing age (Fig. 8f, g).  
12 Langille et al (2014) reported that Lachnospiraceae, Ruminococcaceae and Oscillospiraceae  
13 are phylogenetically closely related and characterize the murine gut microbiota during early  
14 life stages. Our result supports tight associations among these groups and their role  
15 characterizing a stable state representing early-life gut microbiota. C<sub>93</sub> changed to C<sub>125</sub> (29  
16 weeks age) and C<sub>125</sub> changed to C<sub>253</sub> (38 weeks age) due to appearance of *Turicibacter* and  
17 *Bifidobacterium*, respectively. The response of *Turicibacter* and *Bifidobacterium* to age had a  
18 prominent role in the community level response during these shifts. However, the importance  
19 of interspecific relationships was also identified. Since *Turicibacter* and *Bifidobacterium* had  
20 a negative relationship with Lachnospiraceae, Ruminococcaceae and *Oscillospira*, they could  
21 not appear until 28 and 39 weeks of age, respectively. Here, presence of *Turicibacter*  
22 facilitated appearance of *Bifidobacterium* due to their positive relationship. In terms of the  
23 height of energy barriers, the transition between alternative stable states tended to be  
24 unidirectional (from C<sub>227</sub> to C<sub>93</sub>) in the early life stage and bidirectional in the later life stage  
25 (between C<sub>227</sub> and C<sub>125</sub> or C<sub>253</sub>). Furthermore, the mechanism of changing compositional  
26 variability was inferred from the analysis of energy distribution of basins of attraction. Our  
27 results suggest that there were two mechanisms. The first is the change in the number of  
28 community compositions in the basin of attraction, which directly affects the magnitude of  
29 compositional variability a basin accommodates, and thus corresponds to Holling's ecological  
30 resilience (Holling 1996). The second is the change in the shape of basin of attraction,  
31 especially related to the kind of curvature around the stable state (Fig. 8d, e). This relates to  
32 the return time to a stable state, and corresponds to Holling's engineering resilience (Holling  
33 1996). Not only the change in the height of barrier between stable states but also these  
34 mechanisms governing compositional variability works synergistically in the age-related loss  
35 of stability in murine gut microbiota.

36  
37 As an approximation of a stability landscape, the energy landscape would provide a reliable  
38 map for those who seek an effective path between different community compositions. In

1 conservation biology, knowledge of the paths by which communities are assembled helps  
2 ecologists to understand the role of history in shaping current communities, and is important  
3 for effective community restoration (Weiher and Keddy 1999, Lockwood & Samuels 2004,  
4 Suding et al. 2004, Wilsey et al. 2015, Young et al. 2005, 2015). In other words, when  
5 historical contingency occurs, restoring and maintaining native biodiversity may require  
6 specific sequences of exotic species removal and/or native species introduction. This is also  
7 relevant to agriculture, e.g., the successful inoculation of agricultural soils with beneficial  
8 fungi or other microbes may depend on the timing of inoculation relative to plant growth, as  
9 well as the profile of other soil microbes (Verbruggen et al. 2013, Toju et al. 2018). In  
10 medicine, the relevance of historical contingency in community assemblies to curing some  
11 human diseases is being recognized (Costello et al. 2012, Fierer et al. 2012, Lam & Monack  
12 2014, Devevey et al. 2015). Clinically meaningful evidence for the potential application of  
13 modulating the intestinal microbiota for therapeutic gain has created considerable interest and  
14 enthusiasm (Smits et al. 2013, Li et al. 2016, Shetty et al. 2017). In addition to *Clostridium*  
15 *difficile* Infection (CDI), a disruption to the gut microbiota is associated with, e.g., irritable  
16 bowel syndrome, autism, obesity, and cavernous cerebral malformations (Karczewski et al.  
17 2014, Cox et al. 2015, Tang et al. 2017). Driving disrupted microbial communities back to  
18 their healthy states could offer novel solutions to prevent and treat complex human diseases.

19  
20 There are alternative methodologies to study stability landscapes. Dynamical models (such as  
21 differential equations) are able to describe shifts in community compositions based on the  
22 gradual changes in population abundance of species (Gravel et al. 2011). If we are able to  
23 estimate the parameters of a dynamical model, it allows us to directly study the stability  
24 landscape that is inferred from observational data. However, it is generally difficult to  
25 develop fully mechanistic models for multi-species communities. The complex nature of  
26 microbial interactions makes it difficult to formulate all the present relationships into  
27 mathematical formulations (Hartig and Dormann 2013; Perretti et al. 2013a, b; De Angelis  
28 and Yurek 2015). Moreover, a theoretical study proved that finding a precise dynamical  
29 equation for a time-series is, in general, computationally intractable even with any  
30 amount/quality of data (Cubitt et al. 2012). Another potential approach may be developing a  
31 Markov chain model with a transition matrix between different community compositions  
32 (Wootton 2001). This can be done if we can obtain multiple observations on two consecutive  
33 community compositions. However, considering the number of possible paths in a  
34 multispecies system, it might not be a realistic approach. Actually, in our LV model with a  
35 constant environment, among randomly sampled 128 pairs of consecutive community  
36 compositions (comparative to the 256 data points used to fit pairwise maximum entropy  
37 models), 88.1% (s.d. 3.8) of them were observed only once. Thus, it is obvious that it requires  
38 much more data to reconstruct a transition matrix. Recently developed methods for

1 reconstructing low dimensional potential landscape (Gibson et al. 2017, Shaw et al. 2019,  
2 Chang et al. 2019) would be an appealing option, but since this approach projects microbial  
3 dynamics onto a low dimensional potential landscape, it is unable to reproduce overall  
4 compositional stability as we see in this paper. Also, it is unable to track the change of  
5 compositional stability across environmental parameters. Considering the data set size and  
6 observational procedure required, our method is a realistic option to study the compositional  
7 stability of empirical communities.

8  
9 There are still some flaws that need to be addressed. First, greater sophistication of the model  
10 fitting framework, including sparse modelling, would improve the performance of our  
11 approach. Second, further verification is required to assess the effect of replacing species'  
12 abundance with presence/absence status. Does the pairwise maximum model always provide  
13 good approximation to the stability landscape? For example, since our approach relies on a  
14 gradient system, it cannot account for attractor dynamics that often appear in ecological  
15 systems. Heteroclinic cycles that cause cyclic alteration of community compositions (Morton  
16 and Law 1997, Fukami et al. 2015) are one example. These dynamics may still be identified  
17 as a set of stable states separated by low energy barriers, though the overall consequence of  
18 approximating dynamics in a continuous phase space into a coarse-grained phase space  
19 (where nodes of the weighted network represent each sub-system of the original phase space)  
20 is unknown. Finally, causal relationships between species' presence/absence status and the  
21 transition of one community state to another are not well represented using our approach.  
22 Incorporating causal analysis (e.g., Sugihara et al. 2012, Runge et al. 2017) will strengthen  
23 our approach, especially when considering applications to control community states.

## 24 25 26 *Conclusion*

27 We have demonstrated the effectiveness of pairwise maximum entropy models as an  
28 approximation of overall compositional stability, which we defined as a stability landscape,  
29 of multispecies communities in a changing environment. The framework of energy landscape  
30 analysis played a prominent role in the success of this approach. Our model opens up new  
31 research directions encompassing the concept of alternative stability in community  
32 assemblies of multispecies communities, and the change in dynamical stability across  
33 environmental gradients, which have mainly been studied in low-dimensional systems in the  
34 past decades. There is urgent need for a methodology that is able to account for  
35 compositional dynamics in multispecies communities. Although some further verification and  
36 improvement is required, we believe that the methodological advancement presented here  
37 will be a new systemic paradigm for developing a predictive theory for real-world ecological  
38 communities (Mouquet et al. 2015).

1  
2  
3  
4  
5  
6  
7  
8  
9  
10  
11  
12  
13  
14  
15  
16  
17

### **Acknowledgements**

We would like to thank two anonymous reviewers, and Samuel R.P.-J. Ross, Taku Kadoya and Hirokazu Toju. This work was supported by the Management Expenses Grant for RIKEN BioResource Research Center, MEXT, and in part by the Center of Innovation Program from Japan Science and Technology Agency (JST) (to K.S. and S.N.), JST PRESTO JPMJPR16E9 (to S.N.), JPMJPR1537 (to S.F.), JST ERATO JPMJER1902 (to S.F.), the Japan Society for the Promotion of Science (JSPS) KAKENHI JP20K06820 and JP20H03010 (to K.S.), JP15H05707 (to S.N.), JP18H04805 (to S.F.), AMED-CREST JP20gm1010009 (to S.F.), the Takeda Science Foundation (to S.F.), the Food Science Institute Foundation (to S.F.) and the Program for the Advancement of Research in Core Projects under Keio University's Longevity Initiative (to S.F.). We declare that we have no conflict of interest.



## 1 **References**

- 2 Araújo, M. B., Luoto M. (2007). The importance of biotic interactions for modelling species  
3 distributions under climate change. *Global Ecology and Biogeography*, 16, 743–753.
- 4 Azaele, S., Muneeppeerakul, R., Rinaldo, A., Rodriguez-Iturbe, I. (2010). Inferring plant  
5 ecosystem organization from species occurrences. *Journal of theoretical biology*, 262(2),  
6 323-329.
- 7 Bakken, J. S., Borody, T., Brandt, L. J., Brill, J. V., Demarco, D. C., Franzos, M. A., et al.  
8 (2011). Treating *Clostridium difficile* infection with fecal microbiota transplantation. *Clinical*  
9 *Gastroenterology and Hepatology*, 9(12), 1044-1049.
- 10 Barbaro, L., Allan, E., Ampoorter, E., Castagnyrol, B., Charbonnier, Y., De Wandeler, H., et  
11 al. (2019). Biotic predictors complement models of bat and bird responses to climate and tree  
12 diversity in European forests. *Proceedings of the Royal Society B*, 286(1894), 20182193.
- 13 Barner, A. K., Coblenz, K. E., Hacker, S. D., Menge, B. A. (2018). Fundamental  
14 contradictions among observational and experimental estimates of non-trophic species  
15 interactions. *Ecology*, 99(3), 557-566.
- 16 Becker, O. M., Karplus, M. (1997). The topology of multidimensional potential energy  
17 surfaces: Theory and application to peptide structure and kinetics. *The Journal of chemical*  
18 *physics*, 106(4), 1495-1517.
- 19 Beisner, B. E., Haydon, D. T. Cuddington, K. Alternative stable states in ecology. *Frontiers*  
20 *in Ecology and the Environment*, 1, 376–382 (2003).
- 21 Bolyen, E., Rideout, J. R., Dillon, M. R., Bokulich, N. A., Abnet, C. C., Al-Ghalith, G. A., et  
22 al. (2019). Reproducible, interactive, scalable and extensible microbiome data science using  
23 QIIME 2. *Nature biotechnology*, 37(8), 852-857.
- 24 Britton, R. A., Young, V. B. (2014). Role of the intestinal microbiota in resistance to  
25 colonization by *Clostridium difficile*. *Gastroenterology*, 146(6), 1547-1553.
- 26 Capitán, J. A., Cuesta, J. A., Bascompte, J. (2011). Statistical mechanics of ecosystem  
27 assembly. *Physical Review Letters*, 103(16), 168101.
- 28 Caporaso, J. G., Kuczynski, J., Stombaugh, J., Bittinger, K., Bushman, F. D., Costello, E. K.,  
29 et al. (2010). QIIME allows analysis of high-throughput community sequencing data. *Nature*  
30 *methods*, 7(5), 335-336.
- 31 Carding, S., Verbeke, K., Vipond, D. T., Corfe, B. M., Owen, L. J. (2015). Dysbiosis of the  
32 gut microbiota in disease. *Microbial ecology in health and disease*, 26(1), 26191.
- 33 Castledine, M., Sierocinski, P., Padfield, D., Buckling, A. (2020). Community coalescence:  
34 an eco-evolutionary perspective. *Philosophical Transactions of the Royal Society B*,  
35 375(1798), 20190252.
- 36 Chang, W. K., VanInsberghe, D., Kelly, L. (2020). Towards a potential landscape framework  
37 of microbiome dynamics. *bioRxiv*, 584201.

- 1 Chase, J.M. (2014). Spatial scale resolves the niche versus neutral theory debate. *Journal of*  
2 *vegetation science*, 25, 319-322.
- 3 Clark, N. J., Wells, K., Lindberg, O. (2018). Unravelling changing interspecific interactions  
4 across environmental gradients using Markov random fields. *Ecology*, 99(6), 1277-1283.
- 5 Costello, E. K., Stagaman, K., Dethlefsen, L., Bohannan, B. J., Relman, D. A. (2012). The  
6 application of ecological theory toward an understanding of the human microbiome. *Science*,  
7 336(6086), 1255-1262.
- 8 Cox, L. M., Blaser, M. J. (2015). Antibiotics in early life and obesity. *Nature Reviews*  
9 *Endocrinology*, 11(3), 182.
- 10 Cubitt, T. S., Eisert, J., Wolf, M. M. (2012). Extracting dynamical equations from  
11 experimental data is NP hard. *Physical Review Letters*, 108, 120503.
- 12 D'Amen, M., Mod, H. K., Gotelli, N. J., Guisan, A. (2018). Disentangling biotic interactions,  
13 environmental filters, and dispersal limitation as drivers of species co-occurrence.  
14 *Ecography*, 41, 1233-1244.
- 15 DeAngelis, D. L., Yurek, S. (2015). Equation-free modeling unravels the behavior of  
16 complex ecological systems. *Proceedings of the National Academy of Sciences*, 112, 3856-  
17 3857.
- 18 Devevey, G., Dang, T., Graves, C. J., Murray, S., Brisson, D. (2015). First arrived takes all:  
19 inhibitory priority effects dominate competition between co-infecting *Borrelia burgdorferi*  
20 strains. *BMC microbiology*, 15(1), 61.
- 21 Ding, T., Schloss, P. D. (2014). Dynamics and associations of microbial community types  
22 across the human body. *Nature*, 509(7500), 357-360.
- 23 Drake, J. A. (1991). Community-assembly mechanics and the structure of an experimental  
24 species ensemble. *The American Naturalist*, 137(1), 1-26.
- 25 Elith, J., H. Graham, C., P. Anderson, R., Dudík, M., Ferrier, S., Guisan, A., et al. (2006).  
26 Novel methods improve prediction of species' distributions from occurrence data.  
27 *Ecography*, 29(2), 129-151.
- 28 Ezaki, T., Sakaki, M., Watanabe, T., Masuda, N. (2018). Age-related changes in the ease of  
29 dynamical transitions in human brain activity. *Human brain mapping*, 39(6), 2673-2688.
- 30 Ezaki, T., Watanabe, T., Ohzeki, M., Masuda, N. (2017). Energy landscape analysis of  
31 neuroimaging data. *Philosophical Transactions of the Royal Society A: Mathematical,*  
32 *Physical and Engineering Sciences*, 375(2096), 20160287.
- 33 Fierer, N., Ferrenberg, S., Flores, G. E., González, A., Kueneman, J., Legg, T., et al. (2012).  
34 From animalcules to an ecosystem: application of ecological concepts to the human  
35 microbiome. *Annual Review of Ecology, Evolution, and Systematics*, 43, 137-155.
- 36 Franklin, J. (2010). Mapping species distributions: spatial inference and prediction.  
37 Cambridge University Press.

- 1 Freilich, M. A., Wieters, E., Broitman, B. R., Marquet, P. A., Navarrete, S. A. (2018).  
2 Species co-occurrence networks: Can they reveal trophic and non-trophic interactions in  
3 ecological communities? *Ecology*, 99(3), 690-699.
- 4 Fukami, T. (2010). Community assembly dynamics in space. In *Community ecology:  
5 Processes, models, and applications*. Edited by Herman A. Verhoef and Peter J. Morin, 45–  
6 54. Oxford: Oxford Univ. Press.
- 7 Fukami, T. (2015). Historical contingency in community assembly: integrating niches,  
8 species pools, and priority effects. *Annual Review of Ecology, Evolution, and Systematics*, 46,  
9 1-23.
- 10 Fukami, T., Dickie, I. A., Paula Wilkie, J., Paulus, B. C., Park, D., Roberts, A., et al. (2010).  
11 Assembly history dictates ecosystem functioning: evidence from wood decomposer  
12 communities. *Ecology letters*, 13(6), 675-684.
- 13 Fukami, T., Morin, P. J. (2003). Productivity–biodiversity relationships depend on the history  
14 of community assembly. *Nature*, 424(6947), 423.
- 15 Gerber, G. K. (2014). The dynamic microbiome. *FEBS letters*, 588(22), 4131-4139.
- 16 Gibson, T. E., Carey, V., Bashan, A., Hohmann, E. L., Weiss, S. T., Liu, Y. Y. (2017). On the  
17 Stability Landscape of the Human Gut Microbiome: Implications for Microbiome-based  
18 Therapies. *bioRxiv*, 176941.
- 19 Gilks, W. R., Richardson, S., Spiegelhalter, D. J. (1996). Introducing Markov chain Monte  
20 Carlo. Markov chain Monte Carlo in practice. Chapman & Hall .
- 21 Gilpin, M. E., Case, T. J. (1976). Multiple domains of attraction in competition communities.  
22 *Nature*, 261(5555), 40-42.
- 23 Gravel, D., Guichard, F., Hochberg, M. E. (2011). Species coexistence in a variable world.  
24 *Ecology letters*, 14(8), 828-839.
- 25 Harris, D. J. (2015). Multi-Process Statistical Modeling of Species' Joint Distributions.  
26 University of California, Davis.
- 27 Harris, D. J. (2016). Inferring species interactions from co-occurrence data with Markov  
28 networks. *Ecology*, 97(12), 3308-3314.
- 29 Harte, J. (2011). Maximum entropy and ecology: a theory of abundance, distribution, and  
30 energetics. OUP Oxford.
- 31 Harte, J., Newman, E. A. (2014). Maximum information entropy: a foundation for ecological  
32 theory. *Trends in ecology & evolution*, 29(7), 384-389.
- 33 Hartig, F. Dormann, C. F. (2013). Does model-free forecasting really outperform the true  
34 model? *Proceedings of the National Academy of Science*, 110, E3975-E3975.
- 35 Holling, C. S. (1996). Engineering resilience versus ecological resilience. In *Engineering  
36 within Ecological Constraints*, ed. PC Schulze, pp. 31–44. Washington, DC: Natl. Acad.  
37 Press.

- 1 Jaynes, E.T., (1982). On the rationale of maximum-entropy methods. *Proceedings of the*  
2 *IEEE*, 70, 939–952.
- 3 Jiang, L., Joshi, H., Flakes, S. K., Jung, Y. (2011). Alternative community compositional and  
4 dynamical states: the dual consequences of assembly history. *Journal of Animal Ecology*,  
5 80(3), 577-585.
- 6 Kadowaki, K., Inouye, B. D., Miller T. E. (2012). Assembly-History Dynamics of a Pitcher-  
7 Plant Protozoan Community in Experimental Microcosms. *PLoS One*, 7(8), e42651.
- 8 Karczewski, J., Poniedziałek, B., Adamski, Z., Rzymiski, P. (2014). The effects of the  
9 microbiota on the host immune system. *Autoimmunity*, 47(8), 494-504.
- 10 Kelly C. P., LaMont J. T. (2008). *Clostridium difficile*—more difficult than ever. *New*  
11 *England Journal of Medicine*, 359: 1932-1940, 2008.
- 12 Keymer, J. E., Marquet, P. A., Velasco-Hernández, J. X., Levin, S. A. (2000). Extinction  
13 thresholds and metapopulation persistence in dynamic landscapes. *The American Naturalist*,  
14 156(5), 478-494.
- 15 Kissling, W. D., Dormann, C. F., Groeneveld, J., Hickler, T., Kühn, I., McNerny, G. J., et al.  
16 (2012). Towards novel approaches to modelling biotic interactions in multispecies  
17 assemblages at large spatial extents. *Journal of Biogeography*, 39(12), 2163-2178.
- 18 Lahti, L., Salojärvi, J., Salonen, A., Scheffer, M., De Vos, W. M. (2014). Tipping elements in  
19 the human intestinal ecosystem. *Nature communications*, 5(1), 1-10.
- 20 Lam, L. H., Monack, D. M. (2014). Intraspecies competition for niches in the distal gut  
21 dictate transmission during persistent Salmonella infection. *PLoS Pathogens*, 10(12),  
22 e1004527.
- 23 Langille, M. G., Meehan, C. J., Koenig, J. E., Dhanani, A. S., Rose, R. A., Howlett, S. E., et  
24 al. (2014). Microbial shifts in the aging mouse gut. *Microbiome*, 2(1), 50.
- 25 Law, R., A. J. Weatherby, P. H. Warren. (2000). On the invasibility of persistent protist  
26 communities. *Oikos*, 88, 319–326.
- 27 Law, R., Morton, R. D. (1993). Alternative permanent states of ecological communities.  
28 *Ecology*, 74(5), 1347-1361.
- 29 Leach, K., Montgomery, W. I., Reid, N. (2016). Modelling the influence of biotic factors on  
30 species distribution patterns. *Ecological Modelling*, 337, 96-106.
- 31 Legendre, P., Mi, X., Ren, H., Ma, K., Yu, M., Sun, I.F., et al. (2009). Partitioning beta  
32 diversity in a subtropical broad-leaved forest of China. *Ecology*, 90, 663-674.
- 33 Li, S. S., Zhu, A., Benes, V., Costea, P. I., Hercog, R., Hildebrand, F., et al. (2016). Durable  
34 coexistence of donor and recipient strains after fecal microbiota transplantation. *Science* 352,  
35 586–586.
- 36 Lockwood, J. L., Samuels, C. L. (2004). Assembly models and the practice of restoration. In  
37 *Assembly Rules and Restoration Ecology: Bridging the Gap Between Theory and Practice*,  
38 ed. VM Temperton, RJ Hobbs, T Nuttle, S Halle, pp. 55–70. Washington, DC: Island Press.

- 1 May, R. M. (1977). Thresholds and breakpoints in ecosystems with a multiplicity of stable  
2 states. *Nature*, 269(5628), 471-477.
- 3 Meier, E. S., Kienast, F., Pearman, P. B., Svenning, J. C., Thuiller, W., Araújo, M. B., et al.  
4 (2010). Biotic and abiotic variables show little redundancy in explaining tree species  
5 distributions. *Ecography*, 33(6), 1038-1048.
- 6 Mertes, K., Jetz, W. (2018). Disentangling scale dependencies in species environmental  
7 niches and distributions. *Ecography*, 41, 1604-1615.
- 8 Meynard, C.N., Lavergne, S., Boulangeat, I., Garraud, L., Van Es, J., Mouquet, N., et al.  
9 (2013). Disentangling the drivers of metacommunity structure across spatial scales. *Journal*  
10 *of biogeography*, 40, 1560-1571.
- 11 Morton, R. D., Law, R. (1997). Regional species pools and the assembly of local ecological  
12 communities. *Journal of Theoretical Biology*, 187, 321–331.
- 13 Mouquet, N., Lagadeuc, Y., Devictor, V., Doyen, L., Duputié, A., Eveillard, D., et al. (2015).  
14 Predictive ecology in a changing world. *Journal of Applied Ecology*, 52(5), 1293-1310.
- 15 Mueller, U. G., Sachs, J. L. (2015). Engineering microbiomes to improve plant and animal  
16 health. *Trends in microbiology*, 23(10), 606-617.
- 17 Nakanishi, Y., Nozu, R., Ueno, M., Hioki, K., Ishii, C., Murakami, S., et al. (2020).  
18 Longitudinal analyses reveal that aging-related alterations in the intestinal environment lead  
19 to gut dysbiosis with the potential to induce obesity. *Research Square*  
20 [<https://doi.org/10.21203/rs.3.rs-119480/v1>].
- 21 Nguyen, H. C., Zecchina, R., Berg, J. (2017). Inverse statistical problems: from the inverse  
22 Ising problem to data science. *Advances in Physics*, 66(3), 197-261.
- 23 Ockendon, N., Baker, D. J., Carr, J. A., White, E. C., Almond, R. E., Amano, T., et al.  
24 (2014). Mechanisms underpinning climatic impacts on natural populations: altered species  
25 interactions are more important than direct effects. *Global change biology*, 20(7), 2221-2229.
- 26 Parisien, M. A., Moritz, M. A. (2009). Environmental controls on the distribution of wildfire  
27 at multiple spatial scales. *Ecological Monographs*, 79(1), 127-154.
- 28 Perretti, C. T., Munch, S. B., Sugihara, G. (2013a) Model-free forecasting outperforms the  
29 correct mechanistic model for simulated and experimental data. *Proceedings of the National*  
30 *Academy of Science*, 110, 5253-5257.
- 31 Perretti, C. T., Munch, S. B., Sugihara, G. (2013b). Reply to Hartig and Dormann: the true  
32 model myth. *Proceedings of the National Academy of Science*, 110, E3976-E3977.
- 33 Phillips, S. J., Anderson, R. P., Schapire, R. E. (2006). Maximum entropy modeling of  
34 species geographic distributions. *Ecological modelling*, 190(3-4), 231-259.
- 35 Phillips, S. J., Dudík, M., Schapire, R. E. (2004). A maximum entropy approach to species  
36 distribution modeling. In *Proceedings of the twenty-first international conference on Machine*  
37 *learning* (p. 83).

- 1 Pu, Z., Jiang, L. (2015). Dispersal among local communities does not reduce historical  
2 contingencies during metacommunity assembly. *Oikos*, 124(10), 1327-1336.
- 3 Rillig, M. C., Antonovics, J., Caruso, T., Lehmann, A., Powell, J. R., Veresoglou, S. D., et al.  
4 (2015). Interchange of entire communities: microbial community coalescence. *Trends in*  
5 *Ecology and Evolution*, 30(8), 470-476.
- 6 Runge, J., Nowack, P., Kretschmer, M., Flaxman, S., Sejdinovic, D. (2019). Detecting and  
7 quantifying causal associations in large nonlinear time series datasets. *Science Advances*,  
8 5(11), eaau4996.
- 9 Sbahi, H., Di Palma, J. A. (2016). Faecal microbiota transplantation: applications and  
10 limitations in treating gastrointestinal disorders. *BMJ open gastroenterology*, 3(1).
- 11 Scheffer, M., Carpenter, S. R., Dakos, V., van Nes, E. H. (2015). Generic indicators of  
12 ecological resilience: inferring the chance of a critical transition. *Annual Review of Ecology,*  
13 *Evolution, and Systematics*, 46, 145-167.
- 14 Scheffer, M., Carpenter, S. R., Foley, J. A., Folke, C., Walker, B. (2001). Catastrophic shifts  
15 in ecosystems. *Nature*, 413(6856), 591.
- 16 Scheffer, M., Carpenter, S. R., Lenton, T. M., Bascompte, J., Brock, W., Dakos, V., et al.  
17 (2012). Anticipating critical transitions. *Science*, 338(6105), 344-348.
- 18 Scheffer, M., Jeppesen, E. (2007). Regime shifts in shallow lakes. *Ecosystems*, 10(1), 1-3.
- 19 Schneidman, E., Berry, M. J., Segev, R., Bialek, W. (2006). Weak pairwise correlations  
20 imply strongly correlated network states in a neural population. *Nature*, 440(7087), 1007-  
21 1012.
- 22 Schröder, A., Persson, L., De Roos, A. M. (2005). Direct experimental evidence for  
23 alternative stable states: a review. *Oikos*, 110(1), 3-19.
- 24 Shaw, L. P., Bassam, H., Barnes, C. P., Walker, A. S., Klein, N., Balloux, F. (2019).  
25 Modelling microbiome recovery after antibiotics using a stability landscape framework. *The*  
26 *ISME journal*, 13(7), 1845-1856.
- 27 Shetty, S. A., Hugenholtz, F., Lahti, L., Smidt, H., de Vos, W. M. (2017). Intestinal  
28 microbiome landscaping: insight in community assemblage and implications for microbial  
29 modulation strategies. *FEMS microbiology reviews*, 41(2), 182-199.
- 30 Shipley, B., Vile, D., & Garnier, É. (2006). From plant traits to plant communities: a  
31 statistical mechanistic approach to biodiversity. *Science*, 314(5800), 812-814.
- 32 Smits, L. P., Bouter, K. E., de Vos, W. M. et al. (2013). Therapeutic potential of fecal  
33 microbiota transplantation. *Gastroenterology* 145:946–53.
- 34 Sommer, F., Anderson, J. M., Bharti, R., Raes, J., Rosenstiel, P. (2017). The resilience of the  
35 intestinal microbiota influences health and disease. *Nature Reviews Microbiology*, 15(10),  
36 630-638.

- 1 Staniczenko, P. P., Sivasubramaniam, P., Suttle, K. B., Pearson, R. G. (2017). Linking  
2 macroecology and community ecology: refining predictions of species distributions using  
3 biotic interaction networks. *Ecology letters*, 20(6), 693-707.
- 4 Suding, K. N., Gross, K. L., Houseman, G. R. (2004). Alternative states and positive  
5 feedbacks in restoration ecology. *Trends in Ecology and Evolution*, 19, 46–53.
- 6 Sugihara, G., May, R., Ye, H., Hsieh, C. H., Deyle, E., Fogarty, M., et al. (2012). Detecting  
7 causality in complex ecosystems. *Science*, 338(6106), 496-500.
- 8 Tang, A. T., Choi, J. P., Kotzin, J. J., Yang, Y., Hong, C. C., Hobson, N., et al. (2017).  
9 Endothelial TLR4 and the microbiome drive cerebral cavernous malformations. *Nature*,  
10 545(7654), 305.
- 11 Thompson, L. R., Sanders, J. G., McDonald, D., Amir, A., Ladau, J., Locey, K. J., et al.  
12 (2017). A communal catalogue reveals Earth’s multiscale microbial diversity. *Nature*,  
13 551(7681), 457-463.
- 14 Thuiller, W., Pollock, L. J., Gueguen, M., Münkemüller, T. (2015). From species  
15 distributions to meta-communities. *Ecology letters*, 18(12), 1321-1328.
- 16 Toju, H., Abe, M. S., Ishii, C., Hori, Y., Fujita, H., Fukuda, S. (2020). Scoring Species for  
17 Synthetic Community Design: Network Analyses of Functional Core Microbiomes. *Frontiers*  
18 *in microbiology*, 11, 1361.
- 19 Toju, H., Peay, K. G., Yamamichi, M., Narisawa, K., Hiruma, K., Naito, K., et al. (2018).  
20 Core microbiomes for sustainable agroecosystems. *Nature Plants*, 4(5), 247-257.
- 21 Verbruggen, E., van der Heijden, M. G., Rillig, M. C., Kiers, E. T. (2013). Mycorrhizal  
22 fungal establishment in agricultural soils: factors determining inoculation success. *New*  
23 *Phytologist*, 197, 1104–1109.
- 24 Viana, D.S., Chase, J.M. (2019). Spatial scale modulates the inference of metacommunity  
25 assembly processes. *Ecology*, 100, e02576.
- 26 Wales, D. J., Miller, M. A., Walsh, T. R. (1998). Archetypal energy landscapes. *Nature*,  
27 394(6695), 758.
- 28 Walker, B., Holling, C. S., Carpenter, S., Kinzig, A. (2004). Resilience, adaptability and  
29 transformability in social–ecological systems. *Ecology and society*, 9(2).
- 30 Warren, P. H., Law, R., Weatherby, A. J. (2003). Mapping the assembly of protist  
31 communities in microcosms. *Ecology*, 84(4), 1001-1011.
- 32 Watanabe, T., Hirose, S., Wada, H., Imai, Y., Machida, T., Shirouzu, I., et al. (2014a).  
33 Energy landscapes of resting-state brain networks. *Frontiers in Neuroinformatics*, 8, 12.
- 34 Watanabe, T., Masuda, N., Megumi, F., Kanai, R., Rees, G. (2014b). Energy landscape and  
35 dynamics of brain activity during human bistable perception. *Nature Communications*, 5,  
36 4765.
- 37 Watanabe, T., Rees, G. (2017). Brain network dynamics in high- functioning individuals with  
38 autism. *Nature Communications*, 8, 16048.

- 1 Weatherby, A. J., P. H. Warren, R. Law. (1998). Coexistence and collapse: an experimental  
2 investigation of the persistent communities of a protist species pool. *Journal of Animal*  
3 *Ecology* 67, 554–566.
- 4 Weiher, E., Keddy, P. (Eds.). (2001). Ecological assembly rules: perspectives, advances,  
5 retreats. Cambridge University Press.
- 6 Widder, S., Allen, R. J., Pfeiffer, T., Curtis, T. P., Wiuf, C., Sloan, W. T., et al. (2016).  
7 Challenges in microbial ecology: building predictive understanding of community function  
8 and dynamics. *The ISME journal*, 10(11), 2557-2568.
- 9 Wilsey, B. J., Barber, K., Martin, L. M. (2015). Exotic grassland species have stronger  
10 priority effects than natives regardless of whether they are cultivated or wild genotypes. *New*  
11 *Phytologist*, 205, 928–37.
- 12 Wilson, W. G., Deroos, A. M., McCauley, E. (1993). Spatial instabilities within the diffusive  
13 Lotka-Volterra system: individual-based simulation results. *Theoretical population biology*,  
14 43(1), 91-127.
- 15 Wootton, J. T. (2001). Prediction in complex communities: analysis of empirically derived  
16 Markov models. *Ecology*, 82(2), 580-598.
- 17 Young, T. P., Petersen, D. A., Clary, J. J. (2005). The ecology of restoration: historical links,  
18 emerging issues and unexplored realms. *Ecology letters*, 8, 662–73.
- 19 Young, T. P., Zefferman, E. P., Vaughn, K. J., Fick, S. (2015). Initial success of native  
20 grasses is contingent on multiple interactions among exotic grass competition, temporal  
21 priority, rainfall, and site effects. *AoB PLANTS*, 7, 081.
- 22  
23



1

2 **Tables**

3

4 Table 1. Predictability of stable states.

5

| Stable states      | Composition                       | Number of observations | Basin of attraction (precision) | Basin of attraction (recall) |
|--------------------|-----------------------------------|------------------------|---------------------------------|------------------------------|
| C <sub>25233</sub> | (0,1,1,0,0,0,1,0,1,0,0,1,0,0,0,1) | 5332                   | 0.72                            | 0.96                         |
| C <sub>38092</sub> | (1,0,0,1,0,1,0,0,1,1,0,0,1,1,0,0) | 6002                   | 0.78                            | 0.86                         |
| C <sub>59852</sub> | (1,1,1,0,1,0,0,1,1,1,0,0,1,1,0,0) | 8666                   | 0.89                            | 0.70                         |

6

7

8

1  
2  
3

Table 2. Summary statistics of the energy distribution of basins of attraction.

|                  | 10 weeks                         |         |                    |            |      |          | 60 weeks                         |         |                    |             |      |          |
|------------------|----------------------------------|---------|--------------------|------------|------|----------|----------------------------------|---------|--------------------|-------------|------|----------|
|                  | Number of community compositions | Media n | Min (stable state) | Median-Min | IQR  | Kurtosis | Number of community compositions | Media n | Min (stable state) | Media n-Min | IQR  | Kurtosis |
| C <sub>93</sub>  | 191                              | 1.16    | -5.59              | 6.76       | 2.90 | 2.90     | 0                                | n/a     | n/a                | n/a         | n/a  | n/a      |
| C <sub>227</sub> | 65                               | 1.77    | -2.10              | 3.87       | 3.12 | 2.28     | 124                              | -1.11   | -7.68              | 6.58        | 4.62 | 2.29     |
| C <sub>253</sub> | 0                                | n/a     | n/a                | n/a        | n/a  | n/a      | 132                              | -1.87   | -8.08              | 6.21        | 4.66 | 2.34     |

4  
5

1

2 Table 3. Profile of eight genera included in the analysis.  $h$  (effect from unobserved  
3 environmental factors) and  $g$  (genus level response to age) are the parameters inferred by  
4 stochastic approximation, and 0/1 values indicate membership of each genus in stable states  
5 and tipping points (marked by \*).

6

|                        | $h$    | $g$    | $C_{93}$ | $C_{125}$ | $C_{227}$ | $C_{253}$ | $C_{241}^*$ | $C_{247}^*$ |
|------------------------|--------|--------|----------|-----------|-----------|-----------|-------------|-------------|
| <i>Bifidobacterium</i> | -0.003 | 1.814  | 0        | 0         | 1         | 1         | 1           | 1           |
| <i>Prevotella</i>      | 0.509  | 0.337  | 1        | 1         | 1         | 1         | 1           | 1           |
| <i>Turicibacter</i>    | -1.246 | 5.512  | 0        | 1         | 1         | 1         | 1           | 1           |
| UC_Lachnospiraceae     | 0.114  | -0.458 | 1        | 1         | 0         | 1         | 1           | 1           |
| UC_Ruminococcaceae     | -1.84  | -0.844 | 1        | 1         | 0         | 1         | 0           | 0           |
| <i>Oscillospira</i>    | 0.038  | -0.318 | 1        | 1         | 0         | 1         | 0           | 1           |
| <i>Sutterella</i>      | -0.249 | -1.395 | 0        | 0         | 1         | 0         | 0           | 1           |
| UC_RF39                | -3.203 | 1.321  | 0        | 0         | 0         | 0         | 0           | 0           |

7

8

1 **Figure legends**

2

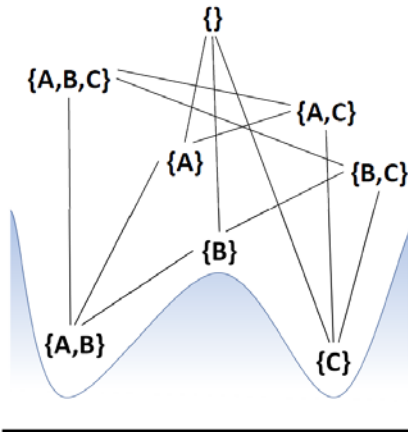

3

4 Figure 1. Example of a stability landscape for a conceptual three-species system. Two species,  
5 A and B, are cooperative, and these species can exclude species C if both of them are present.  
6 On the other hand, C excludes either A or B as long as they are present alone. Arrows indicates  
7 the transition of community composition when species always joins the system one-by-one.  
8 Transition from {A, C} (or {B, C}) to {A, B, C} is only valid when {B} ({A}) appears before  
9 exclusion occur. Here, both composition {A, B} and {C} is a stable state correspond to the  
10 bottom of the valley in the ball and cup diagram. The remaining six transient states can be  
11 divided into those in the basin of either stable state (in terms of the result of competition among  
12 the species present) and those on the ridge between the basins (which can transition to either  
13 of the stable states depending on the subsequent recruitment). Thus, the potential landscape  
14 represented as a smooth curve in the ball and cup diagram is embodied as a network connecting  
15 different species compositions when capturing compositional stability.

16

17

1

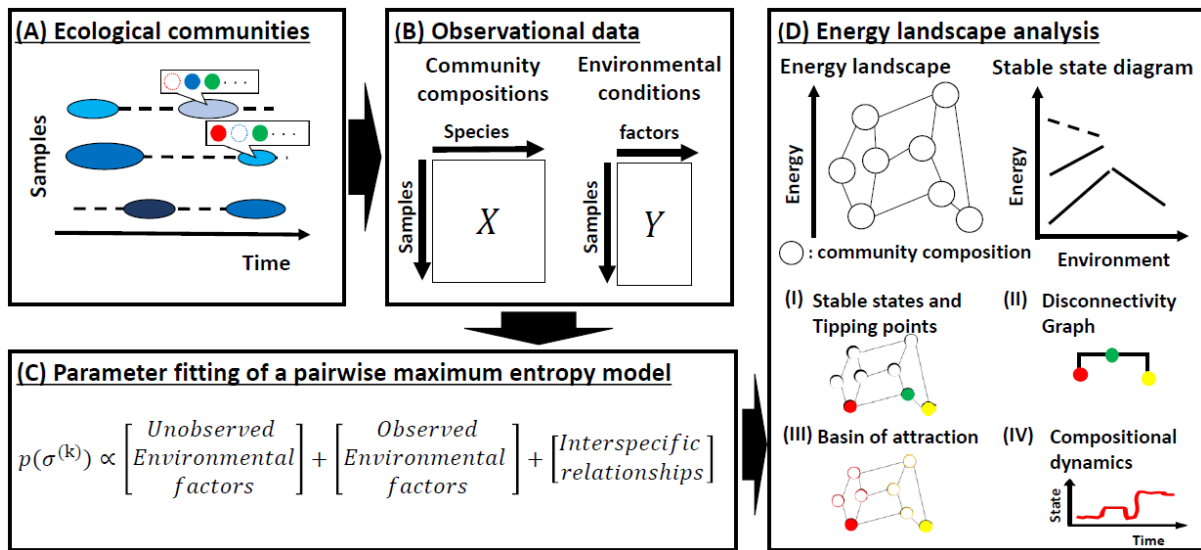

2

3 Figure 2. Illustrative explanation of our approach. (A) we assume that the dataset includes  
 4 occurrence of species in local communities sampled from multiple targets (e.g., sites, hosts)  
 5 and/or timepoints, with possibly accompanying values representing local environmental  
 6 condition (environmental factors) (in the illustration, circles and filled circles show species  
 7 that are absent from or present in a local community, and colors and size of ellipses represent  
 8 differences in environmental condition). (B) dataset is converted to matrices of  
 9 presence/absence status, and environmental factors (if they are available). (C) these matrices  
 10 are used to fit parameters in a pairwise maximum entropy model. Here,  $P(\sigma^{(k)})$  is the  
 11 probability of a community state  $\sigma^{(k)}$  (see Materials and Methods for the detail). (D) the  
 12 fitted pairwise maximum entropy model specifies an energy landscape which is a network  
 13 with nodes representing community states and links representing transitions between  
 14 community compositions. Its change over environmental conditions can be described as a  
 15 stable state diagram. Energy landscape analysis, acknowledges (I) the stable states (red and  
 16 yellow filled-circles) and tipping points (green filled-circle), (II) disconnection graph  
 17 summarizing the hierarchical relationships between the stable states and tipping points, (III)  
 18 basin of attraction of stable states (red and yellow circles indicate basins of attraction of the  
 19 two stable states), (IV) compositional dynamics constrained by the energy landscape.

20

21

1

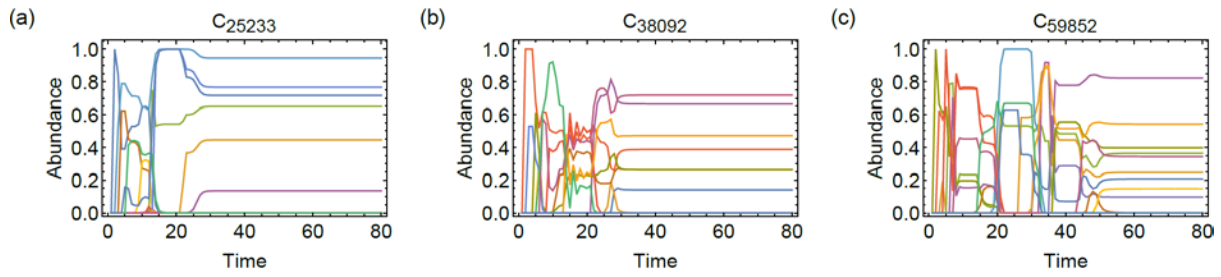

2

3 Figure 3. Examples of population dynamics that converged to three different stable states. (a)

4 C<sub>25233</sub>, (b) C<sub>38092</sub> and (c) C<sub>59852</sub>. See table 1 for the detail of community compositions.

5

6

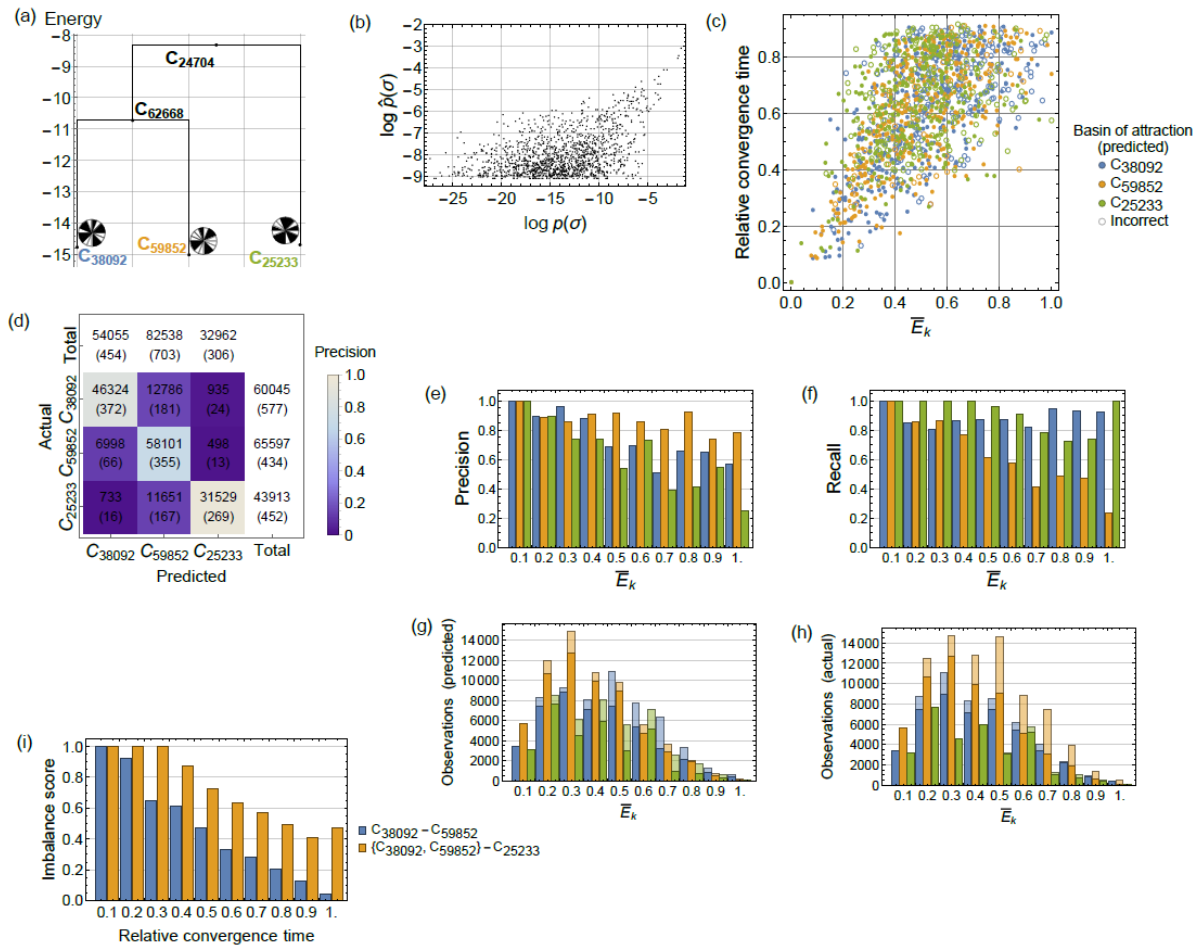

1  
2 Figure 4. Energy landscape of a competitive LV system. (a) disconnectivity graph with three  
3 stable states and two tipping points. (b) scatterplot of the expected ( $P(\sigma^{(k)})$ ) and empirical  
4 ( $\hat{P}(\sigma^{(k)})$ ) probability for community compositions. (c) scatterplot of the rescaled energy ( $\bar{E}_k$ )  
5 and RCT for community compositions. The color of each circles represents the basin of  
6 attraction of the energy landscape and filled or open circles indicate whether it agrees (or  
7 disagrees) with that of the stability landscape. (d) confusion matrix with the number of  
8 observations (the number of community composition is shown in parentheses). Here,  
9 observations of stable states were removed from the result. (e) precision of the prediction of  
10 basin of attraction with respect to observations. (f) recall of the prediction on basin of  
11 attraction with respect to observations. (g) total number of observations for predicted basin of  
12 attraction. (h) total number of observations for actual basin of attraction. In (e-h), values were  
13 calculated for  $\bar{E}_k$  value grouped into 10 bins of equal width. Color of bars indicate predicted  
14 basins of attraction in (g), and actual basins of attraction in (h). Shaded and unshaded areas in  
15 (g, h) indicate observations with mismatch and match between actual and predicted basins of  
16 attraction, respectively. Shaded areas are stacked on the unshaded areas. The ratio of the  
17 unshaded areas to the total length of the bars corresponds to precision in (g) and the same  
18 value in (h) corresponds to recall. (i) imbalance score calculated for the balance between  
19 C<sub>38092</sub> and C<sub>59852</sub> and C<sub>25233</sub> and C<sub>38092</sub>-C<sub>59852</sub>. In the latter case, C<sub>59852</sub> identified with C<sub>38092</sub>.

1

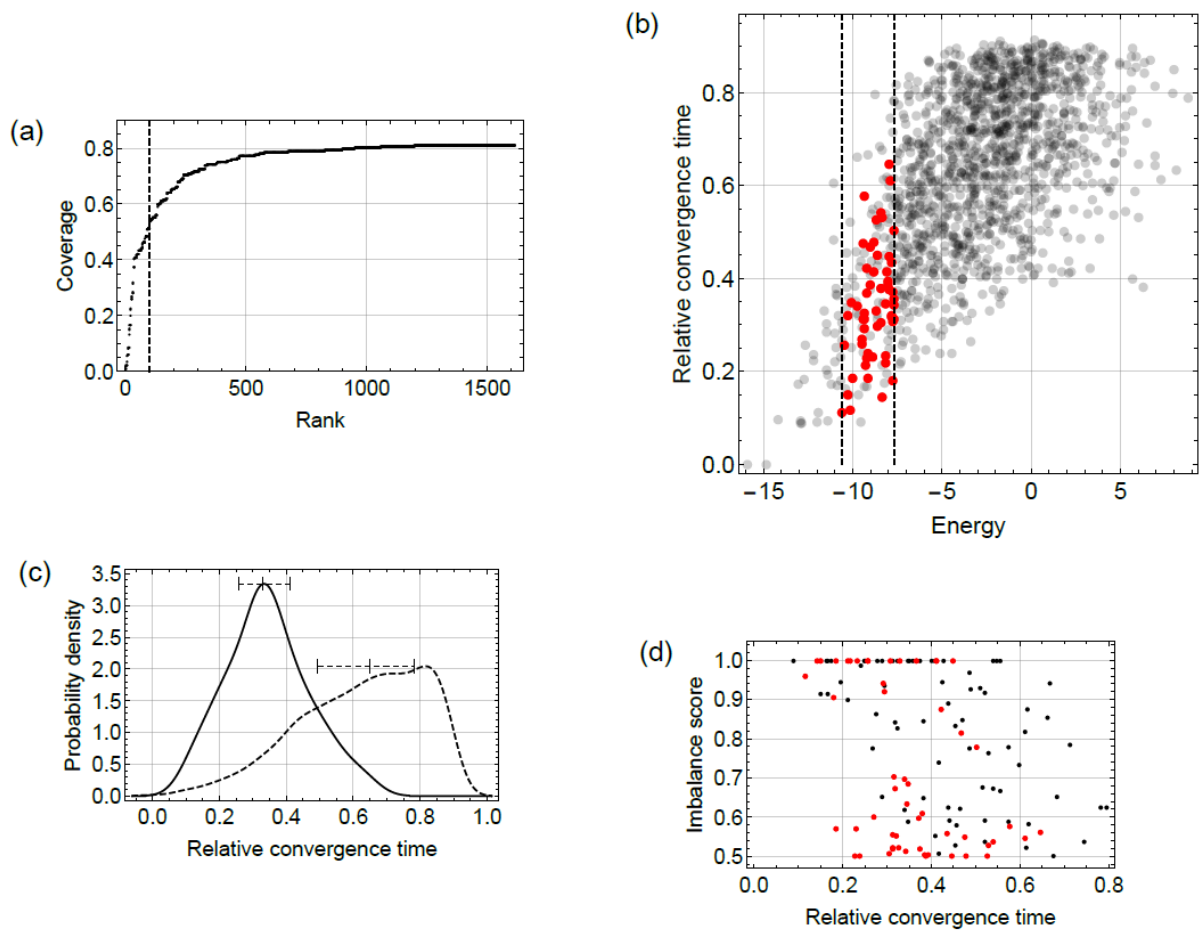

2

3 Figure 5. Emulated compositional dynamics between stable state  $C_{38092}$  and  $C_{59852}$ . (a)  
4 coverage of assembly sequences of the LV data set that converged to  $C_{38092}$  or  $C_{59852}$  (14,668  
5 in total) including the community compositions in effective boundary ranked by their energy.  
6 Dashed line indicates top 100 community compositions (transition channels). (b) smoothed  
7 histogram of RCT of transition channels and that of all community compositions. (c)  
8 scatterplot with energy and RCT for community compositions belonging to the basin of  
9 attraction of  $C_{38092}$  and  $C_{59852}$ , where transition channels are indicated by red points. (d)  
10 relationship between RCT and IS, where transition channels are indicated by red points.

11

12



1

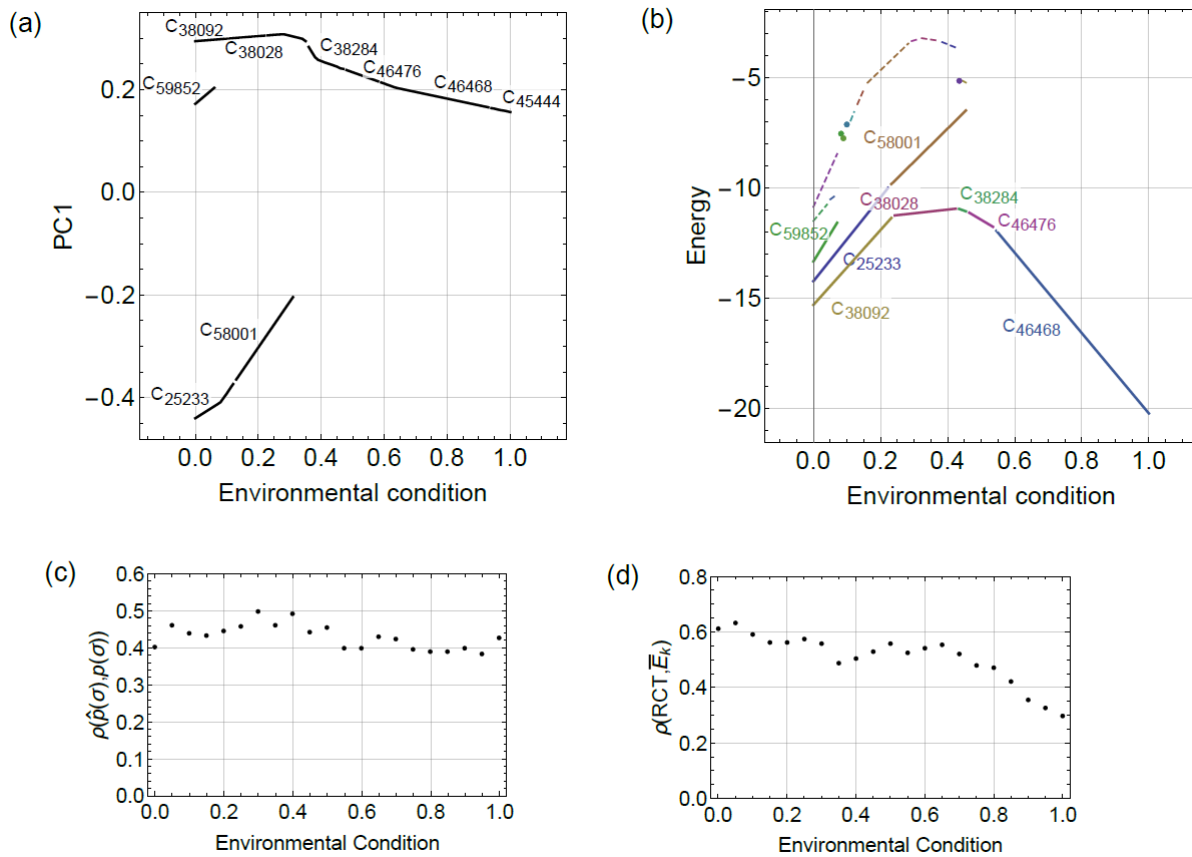

2

3 Figure 6. Change of stability landscape and energy landscape in response to environmental  
 4 change. (a) stable state diagram calculated from LV data sets. Here, vertical axis is PC1  
 5 calculated from PCA including all stable states. (b) stable state diagram from the  
 6 energy landscape analysis. Solid lines indicate stable states and dashed lines indicates  
 7 tipping points. (c) Spearman rank correlation between the expected ( $P(\sigma^{(k)})$ ) and empirical ( $\hat{P}(\sigma^{(k)})$ )  
 8 probability for community compositions. (d) Spearman rank correlation between the rescaled  
 9 energy ( $\bar{E}_k$ ) and RCT for community compositions.

10

11

1

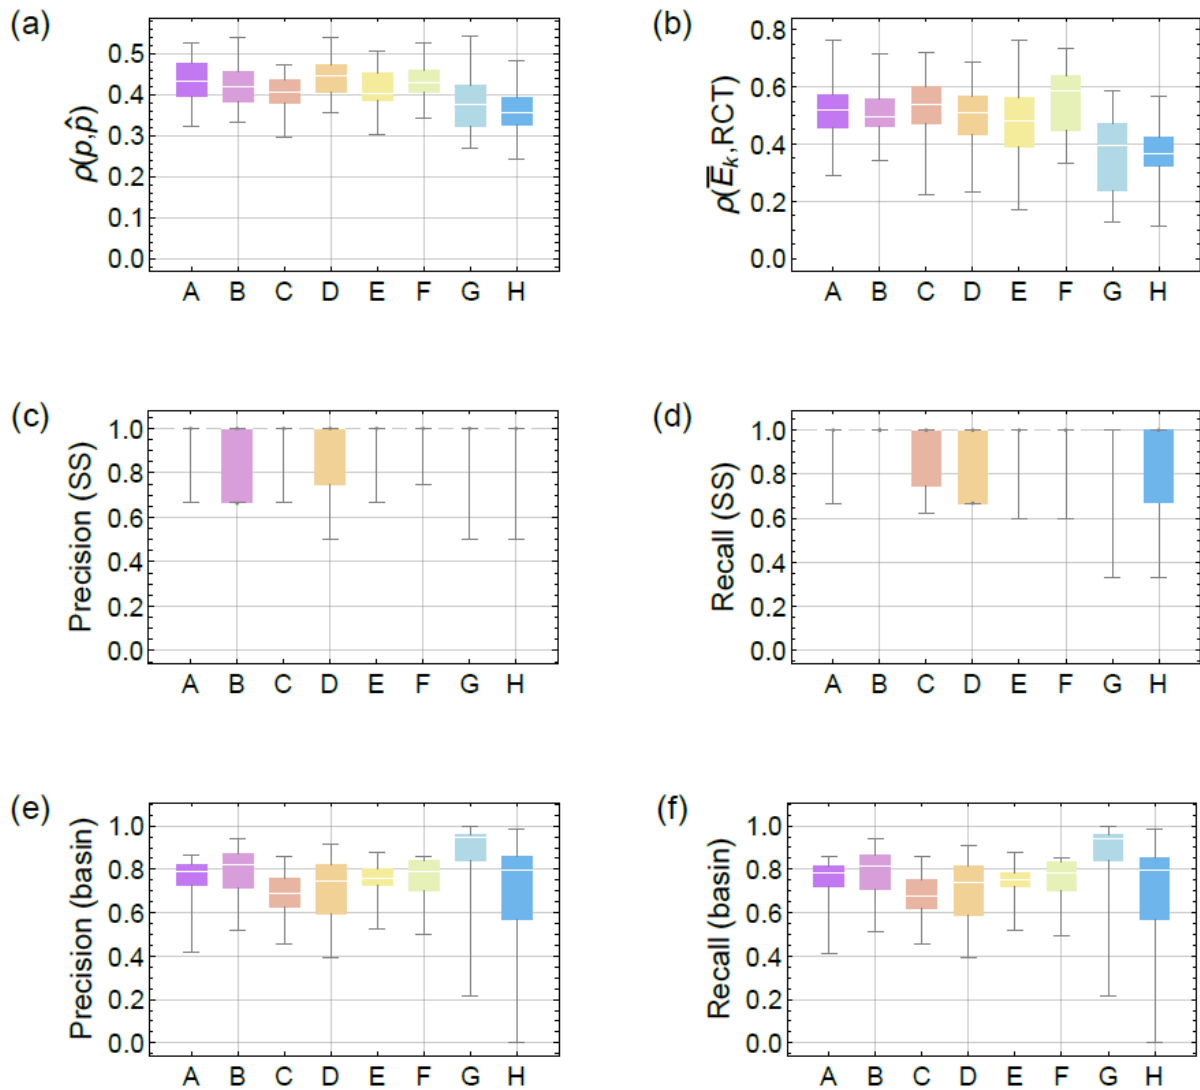

2

3 Figure 7. Benchmarking with different simulation conditions. Spearman rank correlation  
4 between (a) expected and empirical probability for community compositions, and (b) rescaled  
5 energy and RCT, (c, d) precision and recall for the prediction on stable states and (e, f) the  
6 same values for basin of attraction. Precision (recall) for stable states is calculated by the ratio  
7 of correctly identified states in the predicted (actual) stable states, and the same values for  
8 basin of attraction are weighted by the number of observations (see main text). The median  
9 and the first and third quartile value was 1 in A,C,E,F, G, H in (c) and A,B,E,F, C in (d). In  
10 B, D in (c) and C, D, H in (d) the median and the third quartile value was 1. We used 30  
11 independent datasets for each simulation condition. Summarizing the simulation conditions  
12 as (number of species, number of stable states in LV system, number of samples, type of  
13 functional response, strength of noise), they are, A: (16, 3, 256, 1, 0), B: (16, 2, 256, 1, 0), C:  
14 (16, 4, 256, 1, 0), D: (24, 3, 256, 1, 0), E: (16, 3, 128, 1, 0), F: (16, 3, 512, 1, 0), G: (16, 3,  
15 256, 2, 0), H: (16, 3, 256, 1, 0.1). Here, for the type of functional response, 1 indicates Type  
16 I and 2 indicates type II. See Appendix S2 for more information.

1

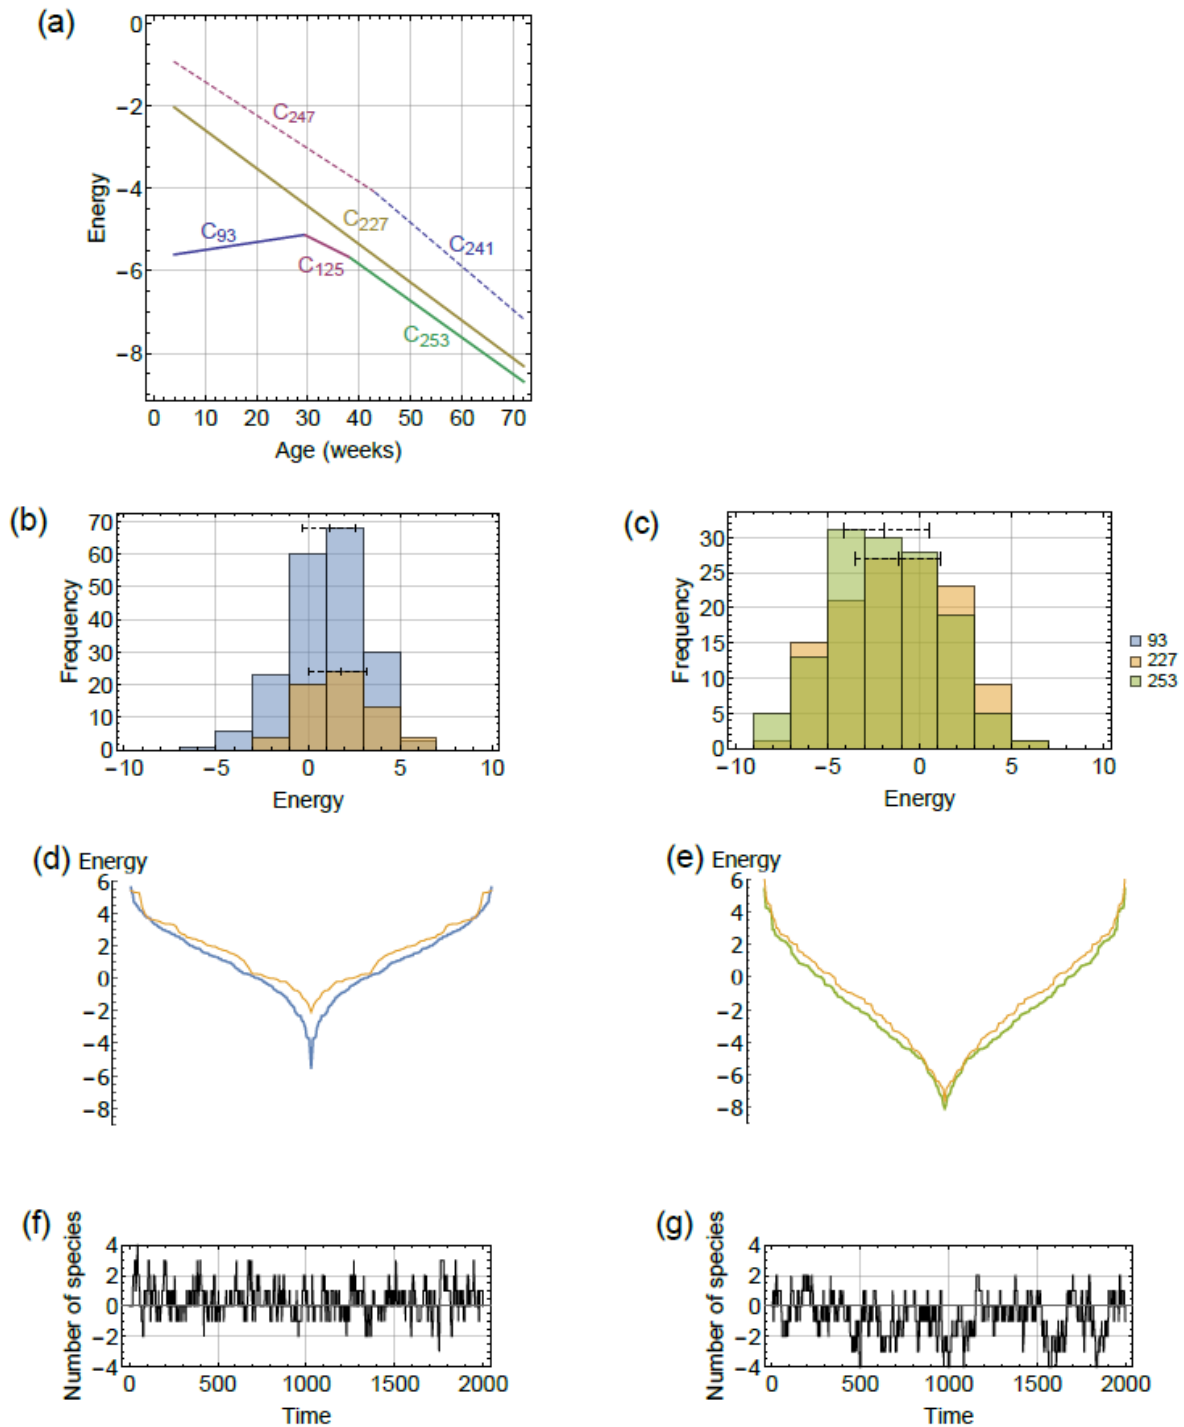

2

3 Figure 8. Stability of a murine gut microbiota. (a) stable state diagram showing the energy of  
4 stable states and tipping points. Here, both stable states (solid lines) and tipping points  
5 (dashed lines) are shown. Each line segment labeled by community composition represents  
6 the range of age in which stable states (or tipping points) exist. (b) the energy distribution of  
7 community compositions in the basins of attraction of C<sub>93</sub> and C<sub>227</sub> at 10 weeks of age. (c) the  
8 energy distribution of community compositions in the basins of attraction of C<sub>227</sub> and C<sub>253</sub> at

1 60 weeks of age. In (b, c) horizontal bars indicate the median and IQR. (d) slope of the  
2 attractive basin of  $C_{93}$  (blue) and  $C_{227}$  (yellow) in 10 weeks of age. (e) slope of the basin of  
3 attraction of  $C_{227}$  (green) and  $C_{253}$  (yellow) in 60 weeks of age. (f) emulated compositional  
4 dynamics around  $C_{253}$ . (g) emulated compositional dynamics around  $C_{253}$ . In (f, g) vertical  
5 axis shows the number of species of corresponding time point minus that of the stable state.  
6  
7

1

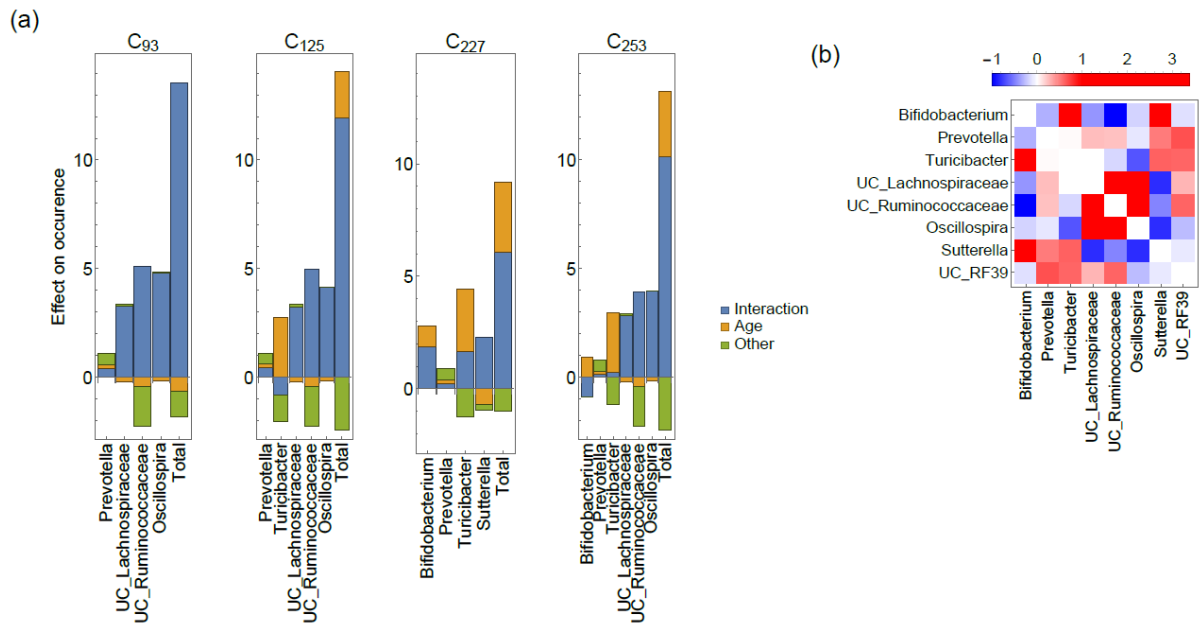

2

3 Figure 9. Estimated parameters for a murine gut microbiota. (a) Strength of the net effect of  
 4 interspecific relationship ( $\sum_j J_{ij} \sigma_i^{(k)} \sigma_j^{(k)}$ ), observed environmental factor (response to age)  
 5 ( $g_i \epsilon$ ) and unobserved environmental factors ( $h_i$ ) for each genus  $i$  (genus level effects) and  
 6 their sum over community members (community level effects),  $\sum_i \sum_j J_{ij} \sigma_i^{(k)} \sigma_j^{(k)}$ ,  $\sum_i g_i \epsilon \in \sigma_i^{(k)}$   
 7 and  $\sum_i h_i \sigma_i^{(k)}$  (shown as ‘total’).  $\sigma_i^{(k)}$  represents membership of each community (Table 3).  
 8 For comparison, we set  $\epsilon = 0.5$ . (b) elements of interspecific relationships ( $J_{ij}$ ). The value  
 9 represents the strength of association between two genera (shown in columns and rows).  
 10 There is a positive association between two genera if the value is positive whereas there is  
 11 negative association if it is negative.

12

13

14

## 1 Appendix S1: Parameter fitting

2

3 The maximum likelihood estimate for the model parameters can be obtained by minimizing  
4 the discrepancy between the values of the data's sufficient statistics and the corresponding  
5 sufficient statistics within the model (Bickel and Doksum 1977, Azaele et al. 2010, Murphy  
6 2012, Harris 2015, Lee and Hastie 2015).

7

8 *Gradient descent algorithm*- For a dataset without observation on environmental conditions,  
9 i.e., whose energy is given by eq. (4), a gradient descent algorithm can be applied (Watanabe  
10 et al. 2014a,b, Harris 2015, Harris 2016). For a model with parameter  $h^*$  and  $J^*$ , let the

11 expected probability of species  $i$  be  $\langle \sigma_i \rangle^* = 1/2^S \sum_{k=0}^{2^S-1} \sigma_i^{(k)} p(\sigma^{(k)})$  and the co-occurrence

12 be  $\langle \sigma_i \sigma_j \rangle^* = 1/2^S \sum_{k=0}^{2^S-1} \sigma_i^{(k)} \sigma_j^{(k)} p(\sigma^{(k)})$ . The parameter  $h$  and  $J$  can be fitted to the data

13 by iteratively adjusting  $\langle \sigma_i \rangle^*$  and  $\langle \sigma_i \sigma_j \rangle^*$  toward the mean occurrence and co-occurrence  
14 calculated from the observational data,  $\langle \sigma_i \rangle$  and  $\langle \sigma_i \sigma_j \rangle$ . Here, the parameters are updated as

$$\begin{aligned} 15 \quad h_i^{\text{new}} &\leftarrow h_i^{\text{old}} + \alpha \log \langle \sigma_i \rangle / \langle \sigma_i \rangle^* \\ 16 \quad J_{ij}^{\text{new}} &\leftarrow J_{ij}^{\text{old}} + \alpha \log \langle \sigma_i \sigma_j \rangle / \langle \sigma_i \sigma_j \rangle^* \end{aligned}$$

17 at each step. We set the learning rate  $\alpha = 0.25$  and the maximum number of iterations  $T =$   
18 5000, according to the preliminary analysis where we checked the convergence of model  
19 parameters.

20

21 *Stochastic approximation*- The likelihood function of the pairwise maximum entropy model  
22 becomes computationally intractable when we need to include environmental condition (as in  
23 eq. (2)), because it requires repeating the above computations independently for every  
24 sample. Therefore, it calls for a different model-fitting algorithm. Here, following Harris  
25 (2015), we introduce a *stochastic approximation* (Robbins and Monro 1951, Salakhutdinov  
26 and Hinton 2012) for this purpose. This algorithm replaces the intractable computations with  
27 tractable Monte Carlo estimates of the same quantities. Despite the sampling error introduced  
28 by this substitution, stochastic approximation provides strong guarantees for eventual  
29 convergence to the maximum likelihood estimate (Younes 1999, Salakhutdinov and Hinton  
30 2012).

31

32 Stochastic approximation (Robbins and Monro 1951, Salakhutdinov and Hinton 2012)  
33 estimates the expected values of the sufficient statistics by averaging over a more manageable  
34 number of simulated assemblages during each model-fitting iteration, while still retaining  
35 maximum likelihood convergence. The advantage of this algorithm is that  $Z$  (eq. (3)) does  
36 not have to be calculated at each step, which significantly improves computational efficiency.

1 This is due to the use of a heat-bath algorithm that only requires calculating energy of two  
 2 adjacent community compositions. The procedure iterates the following steps:

3

4 1. Set  $t = 0$ , initial learning rate  $\alpha_0 = 0.1$ , logistic priors as  $p_h = -\tanh(h/2/2)/2$ ,  $p_g =$   
 5  $-\tanh(g/2/2)/2$  and  $p_J = -\tanh(J/0.5/2)/2$  and initialize parameter values for  $h, J, g$ ,  
 6 and the expected sample states  $X^*(0) = X$ . We set  $Y^* = Y$  throughout the calculation.

7

8 2. Calculate learning rate  $\alpha$  as:

9

$$\alpha = \alpha_0 \frac{5000}{4999 + t},$$

10 momentum  $m$  as:

11

$$m = 0.9 \left( 1 - \frac{1}{0.1t + 2} \right).$$

12

13 3. For  $x_i^*(t)$  from  $i = 1$  to  $N$ , run one step heat-bath algorithm based on current  
 14 parameters ( $h$ ,  $J$  and  $g$ ): transition from the current community composition  $\sigma^{(k)}$  to one of  
 15 its  $S$  adjacent community composition  $\sigma^{(k')}$ , selected with probability  $1/S$ , was attempted  
 16 ( $\sigma^{(k)}$  and  $\sigma^{(k')}$  differs only with respect to the presence/absence status of one of  $S$  species).

17 The transition to the selected state took place with probability  $e^{-E(\sigma^{(k')}|\mathcal{E}^{(i)})} / (e^{-E(\sigma^{(k)}|\mathcal{E}^{(i)})} +$

18  $e^{-E(\sigma^{(k')}|\mathcal{E}^{(i)})}$ ). Here,  $(e^{-E(\sigma^{(k)}|\mathcal{E}^{(i)})}$  and  $e^{-E(\sigma^{(k')}|\mathcal{E}^{(i)})}$  are given by eq. (4). If transition

19 occurs, the sample state is updated as  $x_i^*(t) \leftarrow \sigma^{(k')}$ .

20

21 4. Subtract the simulated sufficient statistics from the observed ones to calculate the  
 22 approximate likelihood gradient. Sufficient statistics are calculated as,  $SS_1^* = X^*(X^*)^t$  (here,  
 23  $(X^*)^t$  is the transpose of  $X^*$ ), and  $SS_2^* = (X^*)^t Y^*$ . Then, we obtain the difference of  
 24 sufficient statistics as:

25

$$\Delta SS_1 = SS_1 - SS_1^*,$$

26 and

27

$$\Delta SS_2 = SS_2 - SS_2^*.$$

28 Here,  $SS_1$  and  $SS_2$  is the corresponding sufficient statistics calculated from actual data (i.e.,  
 29  $SS_1 = XX^t$  and  $SS_2 = X^t Y$ ).

30

31 5. Adjust the model parameters to climb the approximate gradient, using a schedule of step  
 32 sizes as:

33

$$h_{\text{new}} \leftarrow h_{\text{old}} + \Delta h_{\text{new}},$$

34

$$J_{\text{new}} \leftarrow J_{\text{old}} + \Delta J_{\text{new}},$$

1 
$$g_{\text{new}} \leftarrow g_{\text{old}} + \Delta g_{\text{new}}.$$

2 Here,

3 
$$\Delta h_{\text{new}} = \alpha G_h + m \Delta h_{\text{old}},$$

4 
$$\Delta J_{\text{new}} = \alpha G_J + m \Delta J_{\text{old}},$$

5 
$$\Delta g_{\text{new}} = \alpha G_g + m \Delta g_{\text{old}},$$

6 and,

7 
$$G_h = \frac{\text{diag}(\Delta SS_1) + p_h}{N},$$

8 
$$G_J = \frac{\Delta SS_1 + p_J}{N} |I(S) - 1|,$$

9 
$$G_g = \frac{\Delta SS_2 + p_g}{N},$$

10 are the approximated likelihood gradients. Here,  $I(S)$  is a  $S \times S$  identity matrix.

11

12 6. Set  $h_{\text{new}}$ ,  $J_{\text{new}}$ ,  $g_{\text{new}}$ ,  $\Delta h_{\text{new}}$ ,  $\Delta J_{\text{new}}$  and  $\Delta g_{\text{new}}$  as  $h_{\text{old}}$ ,  $J_{\text{old}}$ ,  $g_{\text{old}}$ ,  $\Delta h_{\text{old}}$ ,  $\Delta J_{\text{old}}$   
13 and  $\Delta g_{\text{old}}$ , respectively. If  $t < T$ , increment  $t$  by 1 and back to 2, else terminate the loop.

14

15 The simulations in Step 3 use a one step heat-bath algorithm (Gibbs sampling) to generate a  
16 community composition distribution based on the model's current parameter estimates. While  
17 the subsequent community compositions produced by Gibbs sampling are autocorrelated, this  
18 does not prevent convergence to the maximum likelihood estimates (Younes 1999,  
19 Salakhutdinov and Hinton 2012). Approximated likelihood gradients in Step 5 match those of  
20 gradient descent, except that they are averaged over a set of Monte Carlo samples rather than  
21 over all possible community composition. These gradients were augmented with a  
22 momentum term (Hinton 2012) and by regularizers based on a logistic prior with location 0  
23 and scale 2.0 (for environmental responses) or 0.5 (for pairwise relationships). We set  
24 hyperparameters in this algorithm, including a maximum number of iteration steps  $T =$   
25 50000, according to the preliminary analysis where we checked the convergence of model  
26 parameters.

27

## 28 References

- 29 1. Bickel, P., K. Doksum. (1977). *Mathematical Statistics: Basic Ideas and Selected Topics*.  
30 San Francisco: Holden-Day.
- 31 2. Azaele, S., Muneeppeerakul, R., Rinaldo, A., Rodriguez-Iturbe, I. (2010). Inferring plant  
32 ecosystem organization from species occurrences. *Journal of theoretical biology*, 262(2),  
33 323-329.
- 34 3. Murphy, K. P. (2012). *Machine Learning: A Probabilistic Perspective*. The MIT Press.



- 1 4. Harris, D. J. (2015). Multi-Process Statistical Modeling of Species' Joint Distributions.  
2 University of California, Davis.
- 3 5. Lee, J. D., Hastie, T. J. (2015). Learning the structure of mixed graphical models.  
4 *Journal of Computational and Graphical Statistics*, 24(1), 230-253.
- 5 6. Watanabe, T., Hirose, S., Wada, H., Imai, Y., Machida, T., Shirouzu, I., et al. (2014a).  
6 Energy landscapes of resting-state brain networks. *Frontiers in Neuroinformatics*, 8, 12.
- 7 7. Watanabe, T., Masuda, N., Megumi, F., Kanai, R., Rees, G. (2014b). Energy landscape  
8 and dynamics of brain activity during human bistable perception. *Nature*  
9 *Communications*, 5, 4765.
- 10 8. Harris, D. J. (2016). Inferring species interactions from co-occurrence data with Markov  
11 networks. *Ecology*, 97(12), 3308-3314.
- 12 9. Robbins, H., S. Monro. 1951. A Stochastic Approximation Method. *The Annals of*  
13 *Mathematical Statistics* 22:400–407.
- 14 10. Salakhutdinov, R., and G. Hinton. (2012). An efficient learning procedure for deep  
15 Boltzmann machines. *Neural Computation* 24:1967–2006.
- 16 11. Younes, L. 1999. On the convergence of Markovian stochastic algorithms with rapidly  
17 de- creasing ergodicity rates. *Stochastics: An International Journal of Probability and*  
18 *Stochastic Processes* 65:177–228.
- 19 12. Hinton, G. E. (2012). A practical guide to training restricted Boltzmann machines. In  
20 *Neural networks: Tricks of the trade* (pp. 599-619). Springer, Berlin, Heidelberg.

21  
22

1 Appendix S2: Parameter values and models used to generate data sets

2

3 The interaction matrix used to generate a data set in *Analysis of a competitive Lotka-Volterra*  
4 *system*, *Energy landscape of the LV system*, *Emulating community assembly dynamics*, are in  
5 Table S1.

6

7 The response vector  $b$  in *Energy landscape across environmental gradient* is:

8  $b$

9  $= (0.26, -0.39, 0.16, 0.36, 0, -0.43, 0.28, 0.02, -0.45, -0.46, -0.32, -0.41, 0.14, 0.18, -0.01)$

10

11 In *Benchmarking*, the interaction matrix  $A$  was generated so that the connectance  $c_A = 0.5$ ,  
12 and its non-zero diagonal elements (interspecific competition) were drawn from a normal  
13 distribution with a mean  $\mu_A = 0.6$  and variance  $\sigma_A = 0.2$ . We fixed the diagonal elements  
14 (intraspecific interaction) as  $a_{ii} = 1$ . To obtain the result under type II functional response  
15 (G in Fig. 7), we extended the eq.(5) as

16 
$$dx_i/dt = x_i \left( 1 - \sum_j \frac{a_{ij}x_j}{0.5 + \sum_j a_{ij}x_j} + \sum b_i \varepsilon^* \right),$$

17 and to obtain data set with noise (H in Fig. 7), we used,

18 
$$dx_i/dt = x_i \left( 1 - \sum_j \frac{a_{ij}x_j}{0.5 + \sum_j a_{ij}x_j} + \eta_i \right).$$

19 Here,  $\eta_i$  is assumed to be the i.i.d noise drawn from a normal distribution of mean 0 and s.d.  
20 0.1.

21

22

1

2 Table S1. Elements of matrix A.

|          |          |          |          |          |          |          |          |          |          |          |          |          |          |          |          |
|----------|----------|----------|----------|----------|----------|----------|----------|----------|----------|----------|----------|----------|----------|----------|----------|
| 1        | 0        | 0.5<br>8 | 0.6<br>2 | 0        | 0.6<br>1 | 0.2<br>9 | 0        | 0        | 0.5<br>5 | 0.6<br>9 | 0.5<br>4 | 0.6<br>6 | 0        | 0        | 0        |
| 0.8      | 1        | 0        | 0.5<br>3 | 0.6<br>1 | 0.6<br>5 | 0        | 0.7<br>8 | 0        | 0.5<br>8 | 0.7<br>4 | 0.7<br>2 | 0        | 0.5<br>2 | 0.6<br>2 | 0        |
| 0        | 0        | 1        | 0.6<br>1 | 0.6<br>8 | 0        | 0        | 0        | 0        | 0        | 0        | 0.4<br>5 | 0.6<br>2 | 0.6<br>7 | 0.7      | 0        |
| 0.3<br>3 | 0.5<br>6 | 0.5<br>8 | 1        | 0.5<br>1 | 0.5      | 0.6<br>5 | 0.5<br>2 | 0        | 0.5<br>5 | 0        | 0        | 0.6<br>1 | 0        | 0.5<br>4 | 0.4<br>8 |
| 0.7<br>7 | 0        | 0.6<br>3 | 0.5<br>7 | 1        | 0.6<br>7 | 0.5<br>5 | 0.6<br>1 | 0        | 0.6<br>3 | 0        | 0.5<br>7 | 0        | 0.4<br>8 | 0.5<br>2 | 0.8<br>6 |
| 0        | 0        | 0.5<br>8 | 0.4<br>3 | 0        | 1        | 0.4<br>7 | 0.7<br>5 | 0.5<br>3 | 0        | 0.4<br>9 | 0.4<br>9 | 0.4<br>5 | 0        | 0.5<br>1 | 0        |
| 0.5<br>4 | 0        | 0        | 0.6<br>1 | 0.7      | 0        | 1        | 0        | 0.4      | 0        | 0.6<br>3 | 0        | 0.7<br>9 | 0.5<br>5 | 0        | 0        |
| 0        | 0        | 0.6      | 0.5<br>6 | 0.4<br>3 | 0        | 0.7<br>6 | 1        | 0        | 0        | 0.5<br>1 | 0.9      | 0.5<br>9 | 0.7<br>7 | 0.5<br>2 | 0        |
| 0.5<br>5 | 0        | 0        | 0.6<br>6 | 0.6<br>3 | 0        | 0.6<br>1 | 0        | 1        | 0        | 0.4<br>4 | 0        | 0        | 0        | 0.4<br>8 | 0.3<br>9 |
| 0        | 0.3<br>8 | 0.5<br>6 | 0.5<br>5 | 0        | 0.4<br>7 | 0.5<br>6 | 0.7<br>6 | 0        | 1        | 0        | 0        | 0        | 0.5<br>4 | 0.6<br>2 | 0        |
| 0.4<br>4 | 0        | 0.4<br>9 | 0        | 0.7<br>1 | 0.5<br>2 | 0        | 0.4<br>7 | 0.7<br>7 | 0        | 1        | 0.7<br>5 | 0.8<br>4 | 0        | 0.6<br>7 | 0.7<br>5 |
| 0.5<br>8 | 0.3<br>3 | 0        | 0.4<br>7 | 0.6<br>8 | 0.4<br>6 | 0        | 0.4<br>2 | 0.6<br>1 | 0.6      | 0.6<br>1 | 1        | 0.6<br>3 | 0.7      | 0.6<br>9 | 0        |
| 0.7      | 0        | 0        | 0.5<br>7 | 0        | 0        | 0.6<br>2 | 0        | 0        | 0.7<br>8 | 0.6<br>3 | 0.6<br>7 | 1        | 0        | 0        | 0.5<br>1 |
| 0.5<br>4 | 0.7<br>4 | 0        | 0        | 0.5<br>1 | 0        | 0.7<br>8 | 0.4<br>9 | 0        | 0        | 0.7<br>1 | 0.4<br>4 | 0.4<br>3 | 1        | 0.6<br>4 | 0        |
| 0.4<br>5 | 0        | 0.6<br>2 | 0        | 0.5<br>4 | 0.7<br>3 | 0        | 0.4<br>7 | 0.6<br>7 | 0.7<br>7 | 0        | 0.7      | 0.6<br>9 | 0.5<br>3 | 1        | 0        |
| 0.8<br>1 | 0.4<br>6 | 0        | 0.6<br>7 | 0.3<br>8 | 0.6<br>5 | 0        | 0        | 0.5<br>5 | 0.8<br>5 | 0.7<br>6 | 0        | 0.5<br>8 | 0        | 0.5<br>5 | 1        |

3

4

5

1 Glossary of terms.

2

3 **Actual features** - features characterizing the stability landscape and is calculated by LV data  
4 set; these features are comparable to the features of an energy landscape.

5

6 **Basin of attraction** - in an energy landscape, defined as a set of community compositions that  
7 reach one distinct stable state when assembly processes are completely deterministic; in LV  
8 data set, it is identified by a stable state to which a community composition most frequently  
9 converged (if there is more than one such state, it belongs to all of them).

10

11 **Effective boundary** - community compositions in emulated compositional dynamics having  
12 the highest energy during the transition from one stable state to another.

13

14 **Empirical probability** - one of actual features; the ratio of the number of observations of  $\sigma^{(k)}$   
15 to the total number of observations.

16

17 **Emulated compositional dynamics** – compositional dynamics constrained by an energy  
18 landscape; it is generated by using the heat-bath (also known as Gibbs sampling) method.

19

20 **Energy barrier** - the energy level that need to go up during the transition from one stable state  
21 to another.

22

23 **Energy landscape** - a weighted network whose nodes represent unique community  
24 compositions and links represent transition path between them; nodes are weighted according  
25 to energy E given by eq.(2) or (4); an energy landscape is the approximation of a stability  
26 landscape based on the maximum entropy principle given observational data; energy landscape  
27 analysis is the analysis of topological and connection attributes of an energy landscape.

28

29 **Energy minima** - community compositions having the lowest energy compared to all  
30 neighboring compositions, and thus constitute end-points when assembly processes are  
31 completely deterministic (i.e., when transition of community compositions always go down the  
32 energy landscape); we identify energy minima of an energy landscape as stable states of a  
33 stability landscape.

34

35 **Extended pairwise maximum entropy model** - an extension of the pairwise maximum  
36 entropy model (Markov network) including a term representing environmental effects. We  
37 referred the two models as the pairwise maximum entropy models all together.

38

- 1 **Imbalance score (IS)** - one of actual features; quantifies how stable states to which a  
2 community composition in LV data set converges are uniquely determined.  
3
- 4 **LV data set** - a data set generated by the LV competition model; it is used to calculate actual  
5 features.  
6
- 7 **Relative convergence time (RCT)** - one of actual features; the average number of different  
8 community compositions that a community composition undergoes before converging to a  
9 stable state; it is normalized to have a value between 0 and 1 and indicates distance from a  
10 community composition to a stable state to which it converges.  
11
- 12 **Rescaled energy** - the energy of a community composition normalized to take 0 at a stable  
13 state and 1 at the community composition that has the highest energy within an attractive basin;  
14 for  $\sigma^{(k)}$  it is calculated as,  $\bar{E}_k = (E_k - E_{SS}) / (E_{\max} - E_{SS})$  where  $E_k$  is the energy of  $\sigma^{(k)}$ ,  
15  $E_{SS}$  is the energy of stable state to which basin  $\sigma^{(k)}$  belongs, and  $E_{\max}$  is the energy of a  
16 community composition that is the highest within the basin of attraction.  
17
- 18 **Stable state** – given a fixed set of species, a community composition that can be an end state  
19 of assembly sequences.  
20
- 21 **Stability landscape** - a structure that governs the overall compositional stability of an  
22 ecological community; it can be represented as a graph with a set of community compositions  
23 and transition paths between them (Figure 1).  
24
- 25 **Tipping point** – the community composition located at the lowest part of the ridge between  
26 two basins of attraction.  
27
- 28 **Transition channels** - a fraction of effective boundary that mediates most of the transition  
29 between stable states.  
30  
31  
32  
33
